# Supplementary material for: Bristol girls dance project feasibility study: using a pilot economic evaluation to inform design of a full trial
Source: PubMed Central journal article supplement (PMC3884756; doi:10.1136/bmjopen-2013-003726), 2013-12-19
Supplement: bmjopen-2013-003726.draft_revisions.pdf [file bmjopen-2013-003726.draft_revisions.pdf]

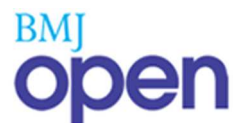

**Bristol Girls Dance Project feasibility study: using a pilot economic evaluation to inform design of a full trial**

|                                 |                                                                                                                                                                                                                                                                                                                                                                                                                                                    |
|---------------------------------|----------------------------------------------------------------------------------------------------------------------------------------------------------------------------------------------------------------------------------------------------------------------------------------------------------------------------------------------------------------------------------------------------------------------------------------------------|
| Journal:                        | <i>BMJ Open</i>                                                                                                                                                                                                                                                                                                                                                                                                                                    |
| Manuscript ID:                  | bmjopen-2013-003726                                                                                                                                                                                                                                                                                                                                                                                                                                |
| Article Type:                   | Research                                                                                                                                                                                                                                                                                                                                                                                                                                           |
| Date Submitted by the Author:   | 07-Aug-2013                                                                                                                                                                                                                                                                                                                                                                                                                                        |
| Complete List of Authors:       | Powell, Jane; University of the West of England, Bristol, Health and Social Sciences<br>Carroll, Fran; University of Bristol, School of Social and Community Medicine<br>Sebire, Simon; University of Bristol, Centre for Exercise Nutrition and Health Sciences<br>Haase, Anne; University of Bristol, Centre for Exercise Nutrition and Health Sciences<br>Jago, Russ; University of Bristol, Centre for Exercise, Nutrition and Health Sciences |
| <b>Primary Subject Heading</b>: | Public health                                                                                                                                                                                                                                                                                                                                                                                                                                      |
| Secondary Subject Heading:      | Health economics, Sports and exercise medicine                                                                                                                                                                                                                                                                                                                                                                                                     |
| Keywords:                       | SPORTS MEDICINE, HEALTH ECONOMICS, PUBLIC HEALTH                                                                                                                                                                                                                                                                                                                                                                                                   |
|                                 |                                                                                                                                                                                                                                                                                                                                                                                                                                                    |

SCHOLARONE™  
Manuscripts

Only

## RESEARCH PILOT STUDY

### **Bristol Girls Dance Project feasibility study: using a pilot economic evaluation to inform design of a full trial**

Powell, J.<sup>1§</sup> Carroll, FE.<sup>2</sup> Sebire SJ.<sup>3</sup> Haase, AM.<sup>3</sup> Jago, R.<sup>3</sup>

<sup>1</sup> Professor of Public Health Economics, Department of Health and Applied Social Sciences, University of the West of England, Glenside Campus, Stapleton, Bristol, BS16 1DD, UK.

<sup>2</sup> Dr Fran E Carroll, Research Assistant, School of Social and Community Medicine, University of Bristol, BS8 2PS, UK.

<sup>3</sup> Dr Simon J Sebire, Post-Doctoral Researcher, Centre for Exercise Nutrition and Health Sciences, School for Policy Studies, University of Bristol, BS8 1TZ, UK.

<sup>3</sup> Dr Anne M Haase, Senior Lecturer in Exercise, Nutrition & Health, Centre for Exercise, Nutrition and Health Sciences, School for Policy Studies, University of Bristol, BS8 1TZ, UK.

<sup>3</sup> Professor Russell Jago, Professor of Paediatric Physical Activity & Public Health Exercise, Nutrition & Health Sciences, Centre for Exercise, Nutrition & Health Sciences, School for Policy Studies, University of Bristol, BS8 1TZ, UK.

<sup>§</sup> Corresponding author Professor Jane Powell - jane.powell@uwe.ac.uk, Department of Health and Applied Social Sciences, University of the West of England, Bristol, BS16 1DD, UK. 0044 117 3288752

## ABSTRACT

**Wider context:** There is currently little guidance for pilot trial economic evaluation where health outcomes and costs are influenced by a range of wider determinants and factors.

**Objectives:** This paper presents the findings of a pilot economic evaluation study running alongside the Bristol Girls Dance Project (BGDP) feasibility study and describes how these have impacted the conduct and design of main trial economic evaluation.

**Design:** Three-arm, cluster randomised, controlled pilot trial and economic evaluation. Seven schools (n=210) from the Bristol and greater Bristol area, UK were randomly allocated to the intervention arm 3 schools (n= 90) and the control arms 4 schools (n=120).

**Intervention:** Girls aged 11-12 years with parental consent were provided with two, 90-minute dance sessions per week for 9-weeks at school facilities.

**Economic measures:** Programme costs, girls' preferences for attributes of dance and competing leisure time activities were measured. Primary outcome: accelerometer-derived moderate-to-vigorous physical activity (MVPA) minutes per day.

**Results:** After-school dance classes for girls aged 11-12 years are valued favourably in terms of other competing leisure choices compared with older adolescents. Discrete Choice Experiment methods are acceptable to girls of this age. The average cost of the BDGP programme per school not including developmental and research costs at mainstream implementation is \$2,555; £1,596; €1,870 and per participant \$85.17; £53.21; €62.32 in 2010-11 prices.

**Conclusions:** The feasibility of providing full cost data for a full trial of the BGDP programme has been established and an embryonic resource use checklist developed for this purpose. This pilot study has demonstrated resources used to develop, prepare and deliver the

1  
2  
3 programme should be categorised separately, so the cost of the mainstream programme can  
4  
5 be estimated accurately in a full trial. A social model of costing that reflects opportunity costs  
6  
7 of participants and parents could be considered.  
8  
9

## 10 11 12 **BACKGROUND** 13

14  
15  
16  
17 Recent influential studies attach substantial economic and social costs to obesity prevalence  
18  
19 projections.<sup>1 2</sup> These forecasts are based upon a body of research from long term cohort  
20  
21 studies which suggest that change in the prevalence of obesity in children and adolescents  
22  
23 born at the millennium is likely to lead to increased health risks in middle-age irrespective of  
24  
25 adult adiposity.<sup>3 4 5</sup> Consequently, there is a need for new interventions that focus on  
26  
27 preventing obesity or changing diet or physical activity; the two behaviours that are central to  
28  
29 the accrual of body mass.  
30  
31

32  
33 As well as being a health and wellbeing issue, children's obesity also has serious economic  
34  
35 impacts. Scarce resources with competing uses in all health systems and the need to decide  
36  
37 between new, 'efficacious' primary prevention physical activity programme interventions on  
38  
39 the grounds of cost-effectiveness, has increased the significance of economic evaluation as a  
40  
41 concept and methodology. Recent guidance from the UK Medical Research Council (MRC)  
42  
43 for the development and evaluation of complex behavioural interventions suggests that  
44  
45 efficacy and cost-effectiveness should be established before programmes are implemented at  
46  
47 the population level.<sup>6 7</sup> However, the meaningful determination of these criteria is often  
48  
49 problematic in primary prevention and guidelines for the design and conduct of economic  
50  
51 evaluation of complex interventions are at an early stage of development.<sup>8 9 10 11</sup> It is therefore  
52  
53 important to develop the conceptual and measurement process by which effectiveness and  
54  
55  
56  
57  
58  
59  
60

1  
2  
3 cost-effectiveness of complex physical activity interventions can be evaluated in a full trial  
4  
5 using a pilot study.  
6  
7

8 The Bristol Girls Dance Project (BGDP) feasibility trial, examined the potential utility of an  
9  
10 after-school dance programme as a means of increasing moderate to vigorous physical  
11  
12 activity (MVPA) among 11-12 year old girls (school year 7) seeking to discover any  
13  
14 improvements that might need to be made to the programme prior to a main trial.<sup>12</sup> This  
15  
16 suggested that it is feasible to deliver the intervention and that participating in dance has the  
17  
18 potential to yield change in girls' physical activity, but a larger randomised controlled trial  
19  
20 (RCT) would be needed to fully evaluate its effectiveness and cost-effectiveness. In the  
21  
22 absence of other evidence for the outcome of dance interventions, another aim of the  
23  
24 feasibility pilot was to refine the information required to sufficiently power a full trial.  
25  
26  
27

28  
29 Preferences for competing after-school activities are potential determinants of the economic  
30  
31 benefit of dance intervention, as increased physical activity must be valued in order for it to  
32  
33 be maintained<sup>8</sup> and to have potential for long-term impact on physical activity levels. In this  
34  
35 study, DCE and survey methods are applied to examine two separate, but complementary  
36  
37 aspects of value – preferences for the attributes of dance classes and preferences for dance  
38  
39 among other competing alternatives for spending leisure time respectively. Physical activity  
40  
41 levels decline during youth<sup>13</sup> with the start of secondary school being a critical period of  
42  
43 change, so it was important to establish comparative preferences for after-school, leisure  
44  
45 activities on weekdays.  
46  
47  
48

49 Value is a concept germane to recruitment and retention rates and linked to the outcome  
50  
51 dimension of the BGDP intervention and therefore important to examine in detail. Discrete  
52  
53 Choice Experiment (DCE) works on the premise that any 'product', for example a healthcare  
54  
55 treatment or physical activity programme, can be described by its characteristics, or  
56  
57  
58  
59  
60

1  
2  
3 attributes, and the extent to which an individual values a 'product' is dependent on the level  
4  
5 of these characteristics.<sup>14 15 16</sup>  
6  
7

8 Thus, this paper reports the learning from and findings of a pilot economic evaluation of the  
9  
10 Bristol Girls Dance Project for girls aged 11-12 years in a primary school setting in England  
11  
12 impact the design and conduct of a full trial economic evaluation. Other findings from the  
13  
14 Bristol Girls Dance Project Feasibility Trial concerning process evaluation, outcomes and  
15  
16 effectiveness have been reported elsewhere.<sup>12</sup>  
17  
18  
19

## 20 ARTICLE SUMMARY

### 21 22 23 *Article focus*

24  
25  
26 To examine the feasibility of providing complete programme cost data from a funder  
27  
28 perspective.  
29

30  
31 To demonstrate the appropriateness of using DCE and survey methods to derive participants'  
32  
33 preferences for dance among other competing leisure activities.  
34

35  
36 To present learning from reflections on the findings of pilot economic evaluation to inform a  
37  
38 full trial economic evaluation  
39

### 40 41 42 *Key messages*

43  
44  
45 A pilot economic evaluation has been applied to learn more about the feasibility of costing  
46  
47 the BGDGP complex intervention and categorising programme resources to identify the  
48  
49 mainstream cost of the intervention during a full trial.  
50

51  
52 Pilot data from seven schools has been analysed to understand girls' preferences for dance  
53  
54 versus other ways of spending their leisure time at age 11-12 years that can help to  
55  
56  
57  
58  
59  
60

1  
2  
3 conceptualise and measure the outcome dimensions of economic evaluation alongside a full  
4  
5 trial.  
6  
7

### 8 *Strengths and limitations of this study*

9

10  
11 This pilot study used a systematic approach to consider how the conceptual and measurement  
12  
13 process of an economic evaluation might be enhanced in a full trial by learning more about  
14  
15 the cost and outcome dimensions of economic evaluation and has produced findings that can  
16  
17 be applied to design and conduct an economic evaluation alongside a full cluster RCT.  
18

19  
20  
21 This feasibility and exploratory pilot study is powered to test the intervention concept, the  
22  
23 feasibility of obtaining programme cost data in categories and the evidence required to power  
24  
25 a full cluster RCT in the future. Consequently, the variation in programme costs at the school  
26  
27 level has not been captured and this is a limitation of the programme cost estimates presented.  
28  
29

## 30 31 32 33 **METHODS**

### 34 35 *Bristol Girls Dance Project (BGDP) feasibility study*

36

37  
38 BGDP was a three-arm, parallel group, cluster randomised, controlled pilot trial with schools  
39  
40 as the unit of allocation. Seven schools from three school districts, Bristol, Bath and South  
41  
42 Gloucestershire (UK) were recruited to take part in the study from schools in these districts  
43  
44 with no current after school dance provision.<sup>12</sup> Stratifying by school district, three schools  
45  
46 were randomly allocated to the intervention arm (n= 90) and four schools to the two control  
47  
48 arms (n=120) and each school was assigned a dance teacher to lead the sessions.  
49

50  
51 Randomisation was conducted by an independent member of the clinical trials unit at Bristol  
52  
53 University using computer-generated random sequences and codes for school district and  
54  
55 school name.  
56  
57  
58  
59  
60

### *Sample size*

This feasibility study was powered to test the intervention concept and to provide the necessary information to calculate the sample size of a full cluster RCT and economic evaluation of an after school dance programme. The important parameters detection of 10 minutes difference in MVPA per weekday (50 minutes per week) between the intervention and control groups, intra-class correlation for weekday MVPA at time 2 and associated confidence intervals have been reported and profiled in another paper from this study.<sup>12</sup> For practical reasons the sample was limited to thirty girls aged 11-12 years per school. Girls were recruited from each school at random from those with parental consent.

### *The intervention*

Intervention participants were provided with two, 90-minute dance sessions per week for 9-weeks at school facilities. The hip-hop and street dance style of dance to popular music was facilitated by a professional dance teacher.

### *Primary outcome measure*

All participants were asked to wear an Actigraph accelerometer for seven days at baseline (week 0) during the last two weeks of the intervention (weeks 8 or 9) and 3 months after the intervention ended (Week 20).

### *Economic measures*

#### *1) Resource use-cost*

Resources used at each stage of the BGDG programme were recorded retrospectively by the project team on time-sheets and expense sheets from a public sector perspective. Costing followed a method applied in a study of complex intervention with children in a school



1  
2  
3 setting (A Stop Smoking in Schools Trial) ASSIST.<sup>17</sup> Stage 0 intervention planning and  
4  
5 development costs or costs associated with running the scientific study (e.g., control group  
6  
7 incentives for data collection, control school dance workshops or recruitment events) would  
8  
9 not recur during mainstream implementation, but these costs are included for completeness.  
10

11  
12  
13  
14 Expenses including entry incentives, postage and Criminal Records Bureau (CRB) checking  
15  
16 were gathered. Travel time was estimated for all staff inputs at the school locations. Girls in  
17  
18 the control schools received incremental thank you gifts at each data collection they attended.  
19  
20 Space hire did not incur costs, but estimates of the cost of space hire for dance class delivery  
21  
22 are included because costs connected with alternative use of space in schools. School  
23  
24 overhead and capital costs are not included.  
25  
26  
27  
28

29  
30 2) *Discrete Choice Experiment (DCE) and survey of preference ranking and use of*  
31  
32 *leisure time*  
33  
34  
35

36 BGDG formative qualitative work indicated the frequency of after-school dance classes per  
37  
38 week; cost per session and how much leisure time is left over on dance class days for other  
39  
40 leisure activities are important considerations for girls.<sup>18</sup> Participants were asked to select the  
41  
42 ‘dance class scenario’ they preferred from a pair of options. Table I presents the 4 paired  
43  
44 scenarios (1A:1B, 2A:2B, 3A:3B, 4A:4B) consisting of a randomly determined combination  
45  
46 of three attributes, each with two levels.  
47  
48

49  
50 Table I  
51  
52  
53  
54

55 Four paired choice scenarios were administered to 210 girls in seven schools - 3 intervention  
56  
57 schools (n=90) and 4 control schools (n=120). Measures were taken at baseline (time 0) and  
58  
59  
60

1  
2  
3 at 9 weeks (time 1) using large cards, and girls' preferred choice for each pair of scenarios  
4  
5 was recorded by the project team. Two time points were needed to establish change in  
6  
7 preferences before and after the intervention. Participants were asked to give preference  
8  
9 ratings for ten leisure activities on weekdays using a ten-point scale (1 = favourite; 10 = least  
10  
11 favourite). Participant responses were collected on Personal Digital Assistants (PDAs) and  
12  
13 downloaded to a customised database.  
14  
15

### 16 17 18 *Ethics* 19

20 Potential participants in all seven schools were told that there was a maximum of 30  
21  
22 randomly assigned spaces at the dance classes. The study was approved by a University of  
23  
24 Bristol ethics committee and informed parental consent was obtained for all participants.  
25  
26  
27

### 28 29 *Analyses* 30

31  
32 Proportions of the sample ranking ten weekday leisure activities as first choice activity (rank  
33  
34 = 1) were calculated after participants had rated all ten leisure activities from 1 to 10.  
35  
36

37 Responses from participants with repetition of ratings for one or more leisure activities or  
38  
39 missing ratings for leisure activities were excluded. Overall, where the proportion of the  
40  
41 sample rating activities as their first choice was the same, these activities were assigned the  
42  
43 same rank across all ten activities. Valid responses as a proportion of total responses for the  
44  
45 survey ranking leisure activities were  $t_2=178/210$ ,  $t_1=130/210$ ,  $t_0=68/210$  across all group  
46  
47 allocations.  
48  
49

50  
51 DCE data was 'effects-coded'<sup>19</sup> using STATA<sup>20</sup> and analysed using conditional logistic  
52  
53 regression. Effects coding is similar to dummy variable coding, but is preferable in this  
54  
55 instance because interaction or trade-off between the attributes is likely to take place as well  
56  
57  
58  
59  
60

1  
2  
3 as a main effect. The coefficients for each attribute are a measure of the influence of that  
4  
5 attribute level on choice. Positive values represent a positive influence on choice, or in other  
6  
7 words, a preference for that level of an attribute. These results can be used to establish girls'  
8  
9 overall preferences for attributes, as well as the order of their preferences (i.e. which attribute  
10  
11 is most and least important). Participants with missing data were excluded from the DCE  
12  
13 analysis.  
14

15  
16  
17 Total and average cost estimates from a funder perspective were identified and derived for  
18  
19 BGDG based on staged timing, quantity, frequency and price of resource use in 2010-11  
20  
21 prices.  
22  
23

## 24 25 26 **RESULTS**

### 27 28 *Identification and timing of resources used*

29  
30  
31 Table II identifies and describes at four stages the resources use of the BGDG programme and  
32  
33 presents total cost estimates. The proportion of total costs incurred were 42% at stage 0, 5%  
34  
35 at stage 1, 47% at stage 2 and 6% at stage 3. BGDG required at least 286 hours of staff input.  
36  
37 Eighteen BGDG dance classes (2 classes per week for 9 weeks) of 90 minutes duration were  
38  
39 delivered to 90 girls in three intervention schools (30 per school) for 81 hours (27 hours per  
40  
41 school) at a total estimated cost of \$7,666; £4,789; €5,609 in 2010-11 prices.<sup>21 22</sup> Removing  
42  
43 stage 0 programme development and stage 1-3 research costs revealed an average cost of  
44  
45 repeating a BGDG programme in its mainstream form per school of \$2,555; £1,596; €1,870  
46  
47 and per participant of \$85.17; £53.21; €62.32 in 2010-11 prices. There are no confidence  
48  
49 intervals for these average programme cost or participant estimates (see limitations of this  
50  
51 pilot study).  
52  
53  
54  
55  
56  
57  
58  
59  
60

1  
2  
3 Table II here  
4  
5  
6

7  
8 The BGDG programme compares favourably in terms of average cost per user with the only  
9  
10 other evidence for costing an after-school dance class programme in England - estimated by  
11  
12 Fordham and Barton<sup>23</sup> and included in NICE guidance<sup>24</sup> on the promotion of physical  
13  
14 activity in children. These estimates<sup>23,24</sup> were based on a report of the NRG dance  
15  
16 programme<sup>25</sup> which was delivered at a total cost of \$32,975; £20,600; €24,129 at 2010-11  
17  
18 prices. Assumptions were made<sup>23</sup> to derive costs for NICE guidance from the NRG report.<sup>25</sup>  
19  
20 The shorter and less intensive NRG programme comprised 10 dance classes of 60 minutes  
21  
22 duration for an assumed number of 24 girls in 14 groups or schools (n=336 girls) for 140  
23  
24 hours with a cost per participant of \$98.14; £61.31; €71.81, in 2010-11 prices. This includes  
25  
26 140 hours of teacher time sourced from national pay scales for England at £23.57 per hour at  
27  
28 2010-11 prices.<sup>26</sup>  
29  
30  
31  
32  
33

### 34 *Preferences for leisure activities*

35  
36

37 All girls were asked to rank ten after-school leisure activities by first preference activity.  
38  
39 Table III presents proportions across the participants (n=210) for preference ranks for after-  
40  
41 school leisure activities for all group allocations at each time point demonstrating consistency  
42  
43 in preference ranks indicating girls' selection of first choice leisure activities at each time  
44  
45 point. The after-school leisure activities indicating the highest proportion of first choice  
46  
47 preference rankings at each time point include 'hanging out with friends away from home just  
48  
49 for fun' (Ranking at t2=1, t1=1, t0=2); 'take part in sports, athletics or physical activity'  
50  
51 (Ranking at t2=2, t1=2, t0=1) and 'using the internet for fun: chats, YouTube, Facebook,  
52  
53 Bebo, Myspace, looking for music' (Ranking at t0=3, t1=3, t2=2).  
54  
55  
56  
57  
58  
59  
60

1  
2  
3 Table III here  
4  
5

6 *DCE results*  
7  
8

9 Table IV indicates girls in this sample have a preference for “time left for other leisure  
10 activities on dance class days”, over the “cost of” and “frequency of dance classes per week”.  
11  
12 Analysis of preference levels within each attribute suggests 2 hours is preferred to 3 hours  
13 remaining for other leisure activities on dance class days. Girls were least concerned with the  
14 frequency of dance classes per week with preference proportions suggesting 2 classes were  
15 preferred to 1 dance class per week. This pattern was consistent in all groups at t0 and t1.  
16  
17  
18  
19  
20  
21  
22  
23  
24

25 Table IV here  
26  
27  
28

29 **DISCUSSION**  
30

31 *What is already known on this topic*  
32  
33

34 There is minimal guidance to support how economic evaluations of complex public health  
35 interventions should be designed and conducted in school and community settings.  
36  
37

38 There are no checklists or tools available to support costing dance programmes and minimal  
39 knowledge of how to categorise resources to identify the mainstream cost of delivery  
40  
41  
42

43 Discrete Choice Experiment (DCE) methods to elicit the relative preferences and choices of  
44 girls aged 11-12 years are untried and untested, but it is important to capture how girls value  
45 dance among other competing leisure activities using a robust and acceptable method.  
46  
47  
48  
49  
50

51 *What this study adds*  
52  
53

54 Providing programme cost data for a full trial of the BGDG programme is feasible. Around  
55 two-fifths of resources are development and research costs, so resources used to develop,  
56  
57  
58  
59  
60

1  
2  
3 prepare and deliver the programme should be categorised separately, so the cost of the  
4  
5 mainstream programme can be estimated accurately in a full trial.  
6  
7

8 Discrete Choice Experiment is an acceptable method to elicit preferences of girls aged 11-12  
9  
10 years.  
11

12  
13 At this point in their lives dance is popular choice when offered within the context of other  
14  
15 competing choices for spending leisure time predicts positive recruitment and retention rates  
16  
17 in after-school dance activities.  
18

19  
20 Participation in dance has opportunity costs for participants and parents extending beyond the  
21  
22 funder that suggest a social model of cost should be considered for a full trial.  
23  
24  
25  
26  
27  
28

29 Robust evidence for the cost-effectiveness of physical activity complex interventions is  
30  
31 important for knowing where to invest scarce resources and commission programmes to  
32  
33 maximise health outcomes in primary prevention.<sup>27 28 29</sup> However, gathering robust evidence  
34  
35 to support investment in public health interventions is a challenge.<sup>30 31</sup> Significant barriers  
36  
37 remain and there is currently little guidance in how to conduct economic evaluation where  
38  
39 behaviour change is associated with health outcomes determined beyond genetic inheritance  
40  
41 by family, social and physical environments.<sup>32 33</sup>  
42  
43  
44

45 Indicative programme cost data from the pilot economic evaluation indicated a substantial  
46  
47 proportion of the intervention programme costs 42% occur at Stage 0 – the pre-programme  
48  
49 planning and development stage. This is an important finding because it suggests provided  
50  
51 BGDG is effective and cost-effective in a full trial, it would be substantially less costly to roll  
52  
53 out in its mainstream form. All complex interventions in primary prevention are likely to  
54  
55 generate a high proportion of upfront development costs that will not reoccur once a  
56  
57  
58  
59  
60

1  
2  
3 programme is mainstreamed – an aspect of investment in public health interventions often  
4 overlooked by decision makers.  
5

6  
7 Application of DCE is an established technique in adult populations, but to our knowledge  
8 has not been applied previously in populations of children aged 11-12 years to establish  
9 values for the attributes of physical activities. This study has demonstrated application of  
10 DCE methods is feasible and acceptable to girls of this age. This is important because it  
11 suggests DCE could be applied in other studies with children to understand the concept of  
12 ‘value’ of an activity which plays an important role in recruitment, participation and  
13 maintenance which are all linked to intervention outcome. In addition to its acceptability the  
14 DCE method produced more complete data than the direct survey method in eliciting  
15 preference ranks for after-school leisure activities. These findings support a previous  
16 contention that DCE techniques may have merit over more ‘traditional’ survey methods<sup>34</sup> in  
17 eliciting preferences. However, more evidence would be required to fully support this  
18 finding.  
19  
20  
21  
22  
23  
24  
25  
26  
27  
28  
29  
30  
31  
32  
33

34  
35 Taken together, findings of the DCE and survey of leisure activity preference in this study  
36 indicate dance is a valued leisure activity among competing alternatives and reveals more  
37 about the attributes of dance classes in girls of this age that can be taken forward to maximise  
38 recruitment and retention in the BGDGP programme. The findings of this study suggest that  
39 dance has immediate appeal as an after-school leisure activity among a range of strongly  
40 competing alternatives in girls of this age compared with older adolescents.<sup>35</sup> Girls in this  
41 study have a first rank preference for the attribute ‘time remaining for other leisure activities  
42 on dance class days’, over the ‘cost of’ and ‘frequency of dance classes per week’. The  
43 finding that in the intervention group two hours is preferred to three hours remaining for  
44 other leisure activities on dance class days is significant. Overall these findings could suggest  
45 that at this point in their lives dance is popular choice in girls of this age when offered within  
46  
47  
48  
49  
50  
51  
52  
53  
54  
55  
56  
57  
58  
59  
60

1  
2  
3 the context of other competing choices for spending leisure time. These are important  
4  
5 findings because they predict positive recruitment rates and participation of girls aged 11-12  
6  
7 years in dance as a physical leisure time activity and in a full trial.<sup>36</sup>  
8  
9

10 Delivery of after-school dance classes is dependent upon substantial commitment from the  
11  
12 girls giving up their after-school leisure time to participate in dancing. In turn, participation  
13  
14 is dependent upon the willingness of parents and carers to support attendance and to provide  
15  
16 encouragement and a means of travelling back home after school hours when school buses  
17  
18 are not available. This pilot study suggests development of a social model of costing that  
19  
20 reflects the cost of participants' and parents' time and opportunity costs are substantial  
21  
22 elements of the intervention cost that could be captured if practical in a full trial.  
23  
24

25  
26  
27 However, methods and tools to capture 'hidden' cost items that facilitate the success of the  
28  
29 intervention, but are not incurred by funders are not yet fully established.<sup>17</sup> How  
30  
31 identification of costs falling outside the public sector that are relevant to programme  
32  
33 implementation can be captured at a full trial stage needs to be considered carefully.<sup>37</sup> In a  
34  
35 full trial resources used should be captured prospectively<sup>38</sup> and this pilot study has  
36  
37 established categories of resource use are also important to consider to establish accurate  
38  
39 mainstream programme costs.  
40  
41  
42  
43  
44

## 45 **CONCLUSIONS**

46  
47 The feasibility of providing costing data for full trial of the BGDGP programme in is  
48  
49 established and an embryonic resource use checklist has been developed. Resources used to  
50  
51 develop and run the BGDGP programme should be categorised separately in order for the  
52  
53 mainstream delivery cost of BGDGP to be estimated accurately in a full trial. A social model of  
54  
55 costing that reflects participants and parents opportunity costs should be considered. BGDGP  
56  
57  
58  
59  
60



1  
2  
3 after-school dance classes have potential for sustained participation and cost-effective  
4  
5 delivery, but a full trial using methodological learning from this study is required.  
6  
7  
8  
9

### 10 **Competing interests**

11  
12 There are no competing interests.  
13  
14

### 15 **Authors' Contributions**

16  
17 The quantitative analysis plan was conceived by JP, FC, RJ and SJS. Analyses were  
18  
19 performed by JP and FC and interpretation by JP, FC, RJ, SJS and AMH. JP drafted the first  
20  
21 version of the manuscript with additional sections provided by FC. All authors provided  
22  
23 critical edits and revisions to the paper and have reviewed and approved the final version of  
24  
25 the paper.  
26  
27  
28  
29  
30  
31

32 **Data sharing statement** No additional data are available  
33  
34  
35  
36

### 37 **Funding**

38  
39 This research was funded by the National Prevention Research Initiative (<http://npri.org.uk>),  
40  
41 consisting of the following funding partners: Alzheimer's Research Trust; Alzheimer's  
42  
43 Society; Biotechnology and Biological Sciences Research Council, British Heart Foundation;  
44  
45 Cancer Research UK; Chief Scientist Office; Scottish Government Health Directorate;  
46  
47 Department of Health; Diabetes UK; Economic and Social Research Council; Engineering  
48  
49 and Physical Sciences Research Council; Health & Social Care Research & Development  
50  
51 Office for Northern Ireland; Medical Research Council; The Stroke Association; Welsh  
52  
53 Assembly Government and World Cancer Research Fund [grant number G090084].  
54  
55  
56  
57  
58  
59  
60

## Acknowledgments

We would like to thank all the participants, dance teachers, school teachers and schools who participated in or assisted with this research. Professor Powell acknowledges discussion of and feedback from a draft version of this paper presented at the Health Economists Bristol (HEB) journal club <http://www.bris.ac.uk/social-community-medicine/centres/healthecon> in November 2011. Laura Davis project manager BGDG and Jade McNeil research associate are acknowledged for data collection leading to this paper. Fran Carroll's contemporaneous PhD research was supervised by Dr Alan A Montgomery at the time of DCE design and data analysis. Dr Jago is supported by a National Institute for Health Research career development fellowship. This work was also supported by DECIPHer, a UKCRC Public Health Research: Centre of Excellence. Funding from the specific funders under the auspices of the UK Clinical Research Collaboration is gratefully acknowledged. The other co-applicants of the main BGDG study, Professor Ashley R Cooper and Dr Alan A Montgomery are acknowledged. The views expressed in this publication are those of the authors and not necessarily those of the NHS, the National Institute for Health Research or the Department of Health.

## References

1. Foresight. *Tackling obesity: future choices*. London: Government Office for Science, 2007.
2. Stamatakis E, Zaninotto P, Falaschetti E, Mindell, J. Head J. Time trends in childhood and adolescent obesity in England from 1995 to 2007 and projections of prevalence to 2015. *J Epidemiol Community Health* 2010; **64**:167-174.
3. Gunnell D, Frankel S, Nanchahal K, et al Childhood obesity and adult cardiovascular mortality: a 57 year follow-up study based on the Boyd Orr cohort. *Am J Clin Nutr* 1998; **67**:1111-18.
4. Must A, Jacques PF, Dallal GE, et al. Long term morbidity and mortality of overweight adolescents – a follow-up of the Havard growth study of 1922 to 1935. *N Engl J Med* 1992; **327**:1350-5.
5. Engeland A, Bjorge T, Sogaard AJ, et al. Body mass index in adolescence in relation to total mortality: 32-year Follow-up of 227,000 Norwegian boys and girls. *Am J Epidemiol* 2003;**157**:517-23.
6. Lancaster GA, Dodd S, Williamson P. Design and analysis of pilot studies: recommendations for good practice. *J Eval Clin Pract* 2004, **10**, 2:307-312.

- 1  
2  
3 7. Craig P, Dieppe P, Macintyre S, Michie S, Nazareth I, Petticrew M. Developing and  
4  
5 evaluating complex interventions: the new Medical Research Council guidance. *BMJ*  
6  
7 2008, 337:a1655.  
8  
9
- 10  
11 8. Wolfenstetter SB. Conceptual framework for standard economic evaluation of  
12  
13 physical activity programmes in primary prevention. *Prev Sci.* 2011; 12(4):435-51.  
14  
15
- 16  
17 9. Sheill, A. Hawe, P. Gold, L. Complex interventions or complex systems? Implications  
18  
19 for health economic evaluation. *BMJ*, 2008; 336:1281-1283.  
20  
21
- 22  
23 10. Weatherly H, Drummond M, Claxton K, et al. *Assessing the challenges of applying*  
24  
25 *standard methods of economic evaluation to public health interventions*. York: Centre  
26  
27 for Health Economics, 2009.  
28  
29
- 30  
31 11. Anderson R. Systematic reviews of economic evaluations: utility or futility. *Health*  
32  
33 *Econ*, 2010;19:350-364.  
34  
35
- 36  
37 12. Jago R. Sebire S, Cooper AR, et al. Bristol Girls Dance Project Feasibility Trial:  
38  
39 Outcome and process evaluation results. *Int J Behav Nutr Phys Act*, 2012; 9, 83.  
40  
41  
42
- 43  
44 13. Gorely T, Marshall S, Biddle SJH, Cameron N. The prevalence of leisure time  
45  
46 sedentary behaviour and physical activity in adolescent girls: An ecological  
47  
48 momentary assessment approach. *Int J Pediatr Obes*, 2007; 2:227-234.  
49  
50
- 51  
52 14. Cheraghi-Sohi S, Bower P, Mead N, McDonald R, Whalley D, Roland M. Making  
53  
54 sense of patient priorities: applying discrete choice methods in primary care using  
55  
56 'think aloud' technique. *Fam Pract*, 2007; 24: 276-282.  
57  
58  
59  
60

- 1  
2  
3 15. Green C, Gerard K. Exploring the social value of health-care interventions: a stated  
4 preference discrete choice experiment. *Health Econ*, 2009; 18:951-976.  
5  
6  
7  
8  
9  
10 16. Petrou S, McIntosh E. (2009) Women's Preferences for Attributes of First-Trimester  
11 Miscarriage Management: A Stated Preference Discrete-Choice Experiment. *Value*  
12 *Health*, 12,4:551-559.  
13  
14  
15  
16  
17 17. Hollingworth W, Cohen D, Hawkins J, et al. Reducing smoking in adolescents: cost-  
18 effectiveness results from the cluster randomised ASSIST (A Stop Smoking in  
19 Schools Trial). *Nicotine & Tob Res*, 2011; 14, 2:161-168.  
20  
21  
22  
23  
24  
25  
26 18. Jago, R. Davis, L. McNeil, J. et al. Adolescent girls' and parents' views on recruiting  
27 and retaining girls into an after-school dance intervention: implications for extra-  
28 curricular physical activity provision. *Int J Behav Nutr Phys Act*, 2011, 8, 91.  
29  
30  
31  
32  
33  
34  
35 19. Bech, M. Gyrd-Hansen, D.. Effects coding in discrete choice experiments. *Health*  
36 *Econ*, 2005; 14,10.  
37  
38  
39  
40  
41  
42 20. STATA CORP LP (2009) *STATA user's guide release 11*. Texas, USA: STATA CORP  
43 LP.  
44  
45  
46  
47  
48 21. Safalra [online] 2012. *Historical UK Inflation and price conversion rates*. Accessed  
49 on May 3<sup>rd</sup> 2012 at:- <http://safalra.com/other/historical-uk-inflation-price-conversion/>.  
50  
51  
52  
53 22. Oanda [online] 2012. *Historical exchange rates*. Accessed on May 3<sup>rd</sup> 2012 at:-  
54 <http://www.oanda.com/currency/historical-rates/>.  
55  
56  
57  
58  
59  
60

- 1  
2  
3 23. Fordham R, Barton GP. *Promotion of physical activity in children programme*  
4  
5 *guidance: a cost-effectiveness scenario analysis*. London:NICE, 2008.  
6  
7  
8  
9  
10 24. NICE public health guidance 17. *Promoting physical activity, active play and sport*  
11 *for pre-school and school-age children and young people in family, pre-school,*  
12 *school and community settings*. NICE:London, 2009.  
13  
14  
15  
16  
17 25. Hampshire Dance and Laban (2007)[online] Accessed on December 7<sup>th</sup> 2012. *NRG*  
18 *Youth Dance and Health Report 2005-6*.  
19  
20 <http://www.hampshiredance.org.uk/documents/NRGEvaluationReport.pdf>  
21  
22  
23  
24  
25 26. TES [online] 2011 *Teacher's pay scales from September 2011 unchanged from 2010*.  
26  
27 <http://www.tes.co.uk/article.aspx?storycode=6000186>  
28  
29  
30  
31  
32 27. Rush B, Sheill A, Hawe P. A census of economic evaluations in health promotion.  
33  
34 *Health Educ Res*, 2004; 19:707-719.  
35  
36  
37  
38 28. Kelly MP, McDaid D, Ludbrook A, Powell JE. *Economic appraisal of public health*  
39 *interventions*. London:Health Development Agency, 2005.  
40  
41  
42  
43  
44 29. Anderson R. New MRC guidance on evaluating complex interventions. *BMJ*,  
45  
46 2008;337:944-5.  
47  
48  
49  
50  
51 30. Buchanan J, Wolstenholme J, Foster C. *A rapid review of economic literature related*  
52 *to the promotion of physical activity, play and sport for pre-school and school-age*  
53 *children in family, pre-school, school and community settings*. London:NICE, 2008.  
54  
55  
56  
57  
58  
59  
60

- 1  
2  
3 31. Richardson AK. Investing in public health: barriers and possible solutions. *J Public*  
4  
5 *Health* 2012; 34:322-7.  
6  
7  
8  
9  
10 32. Ogilvie D, Bull F, Powell J, et al. An applied ecological framework for evaluating  
11  
12 infrastructure to promote walking and cycling: the iConnect study. *Am J Public*  
13  
14 *Health*. 2011;101:473-481.  
15  
16  
17  
18 33. Powell J. Compression of morbidity outcomes key to investment in public health. *J*  
19  
20 *Public Health* 2012; 34:329.  
21  
22  
23  
24  
25 34. Alvarez-Farizo B, Hanley N, Barberan R. The value of leisure time: a contingent  
26  
27 rating approach, *J Environ Plan Man*, 2001; 44(5):681-699.  
28  
29  
30  
31 35. O'Neill, J. Pate, R. Hooker, SP. The contribution of dance to daily physical activity  
32  
33 among adolescent girls. *Int J Behav Nutr Phys Act*, 2011; 8:87.  
34  
35  
36  
37 36. Nader PR, Bradley RH, Houts RM, McRitchie SL, O'Brien M: Moderate-to-vigorous  
38  
39 physical activity from ages 9 to 15 years. *JAMA* 2008, 300:295-305.  
40  
41  
42  
43 37. Alvarez-Farizo B, Hanley N, Barberan R. The value of leisure time: a contingent  
44  
45 rating approach, *J Environ Plan Man*, 2001; 44,5:681-699.  
46  
47  
48  
49 38. Ridyard C, Hughes D. Methods for the collection of resource use data within clinical  
50  
51 trials: a systematic review of the studies funded by the UK Health Technology  
52  
53 Assessment Programme. *Value Health*, 2010; 13, 8:867-872.  
54  
55  
56  
57  
58  
59  
60

## TABLES

**Table I. Attributes and levels of the Discrete Choice Experiment and the four choice sets given to participants**

| Level of attributes                                                                                                                                                                            | Attributes                          |                                                                                                                                                                                                |                                                                                  |
|------------------------------------------------------------------------------------------------------------------------------------------------------------------------------------------------|-------------------------------------|------------------------------------------------------------------------------------------------------------------------------------------------------------------------------------------------|----------------------------------------------------------------------------------|
|                                                                                                                                                                                                | Frequency of dance classes per week | Cost per session                                                                                                                                                                               | Hours left for other leisure activities on that day                              |
| <b>Upper</b>                                                                                                                                                                                   | 2 dance classes per week            | £1 per session                                                                                                                                                                                 | Leaving 3 hours for other leisure activities on the evening of the dance session |
| <b>Lower</b>                                                                                                                                                                                   | 1 dance class per week              | 50p per session                                                                                                                                                                                | Leaving 2 hours for other leisure activities on the evening of the dance session |
| <p style="text-align: center;">1A ←</p> <p>You take one after school dance class each week at a cost of £1 per class leaving you 3 hours on that evening for other leisure activities</p>      |                                     | <p style="text-align: center;">→ 1B</p> <p>You take two after school dance classes each week at a cost of 50p per class leaving you 2 hours on those evenings for other leisure activities</p> |                                                                                  |
| <p style="text-align: center;">2A ←</p> <p>You take two after school dance classes each week at a cost of £1 per class leaving you 2 hours on those evenings for other leisure activities</p>  |                                     | <p style="text-align: center;">→ 2B</p> <p>You take one after school dance class each week at a cost of 50p per class leaving you 3 hours on that evening for other leisure activities</p>     |                                                                                  |
| <p style="text-align: center;">3A ←</p> <p>You take one after school dance class each week at a cost of 50p per class leaving you 2 hours on that evening for other leisure activities</p>     |                                     | <p style="text-align: center;">→ 3B</p> <p>You take two after school dance classes each week at a cost of £1 per class leaving you 3 hours on those evenings for other leisure activities</p>  |                                                                                  |
| <p style="text-align: center;">4A ←</p> <p>You take two after school dance classes each week at a cost of 50p per class leaving you 3 hours on those evenings for other leisure activities</p> |                                     | <p style="text-align: center;">→ 4B</p> <p>You take one after school dance class each week at a cost of £1 per class leaving you 2 hours on that evening for other leisure activities</p>      |                                                                                  |



Table II. Resources, estimated total costs and average cost per participant 2010-11 prices

| <i>Stage of BGD</i>                                        | <i>Description of resources used</i>                                                                                                                                                                                            | <i>Total cost \$ ( £, €)<br/>2010-11 prices</i> |
|------------------------------------------------------------|---------------------------------------------------------------------------------------------------------------------------------------------------------------------------------------------------------------------------------|-------------------------------------------------|
| <b>Stage 0</b><br>Pre-Programme<br>planning<br>development | Nine hours to adapt training programme for hip hop genre, two 3 hour sessions to prepare dance teachers for 9 week intervention delivery by lead dance teacher, 20 hours preparation by 3 dance teachers, disclosures CRB forms | <b>\$8,525</b><br>£5,326<br>€6,238              |
| <b>Stage 1</b><br>Programme<br>preparation                 | Space hire for two 3 hour dance taster sessions, dance teacher's delivery of two 3 hour taster sessions, 2 control recruitment presentations (90 minutes), postage costs                                                        | <b>\$936</b><br>£585<br>€685                    |
| <b>Stage 2</b><br>Programme<br>delivery                    | Delivery of 18 dance classes at 90 minutes per class over 9 weeks in three schools, incentives for intervention schools, incentives for control schools data collection, refreshments                                           | <b>\$9,575</b><br>£5,982<br>€7,007              |
| <b>Stage 3</b><br>Programme<br>reinforcement               | Three dance workshops for two control schools at 90 minutes per workshop, three 6 hour end of intervention performance events for parents                                                                                       | <b>\$1,153</b><br>£720<br>€843                  |
| BGD Stages 0-3                                             | <b>Total cost</b>                                                                                                                                                                                                               | <b>\$20,189</b><br>£12,613<br>€14,773           |
| BGD Stages 1-3                                             | <b>Total cost</b>                                                                                                                                                                                                               | <b>\$11,664</b><br>£7,287<br>€8,535             |
| BGD Stages 1-3                                             | <b>Total cost minus research costs</b>                                                                                                                                                                                          | <b>\$7,666</b><br>£4,789<br>€5,609              |
|                                                            | <b>BGD Cost per participant (N = 90)</b>                                                                                                                                                                                        | <b>\$85.17</b><br>£53.21<br>€62.32              |

Table III. Preference rankings of first choice leisure activities at each time point N (%)

| After-school leisure activity                                                                                         | Time 2  |         | Time 1  |         | Baseline Time 0 |         |
|-----------------------------------------------------------------------------------------------------------------------|---------|---------|---------|---------|-----------------|---------|
|                                                                                                                       | Ranking | N (%)   | Ranking | N (%)   | Ranking         | N (%)   |
| Go around with friends to shopping centres, streets, parks just for fun                                               | 1       | 46 (26) | 1       | 33 (25) | 2               | 12 (18) |
| Use the internet for fun: chats, YouTube, Facebook, Bebo, Myspace, looking for music (do not include school homework) | 2       | 31 (17) | 3       | 20 (15) | 3               | 8 (12)  |
| Take part in sports, athletics or physical activity                                                                   | 2       | 31 (17) | 2       | 22 (17) | 1               | 13 (20) |
| Play with or see friends at your home or their homes                                                                  | 3       | 21 (12) | 4       | 11 (9)  | 5               | 5 (7)   |
| Read books for enjoyment (do not include school books)                                                                | 4       | 13 (7)  | 5       | 10 (8)  | 4               | 6 (9)   |
| Go to discos or dance classes                                                                                         | 5       | 11 (6)  | 8       | 5 (4)   | 5               | 5 (7)   |
| Play a musical instrument, sing, draw, paint or write                                                                 | 6       | 9 (5)   | 4       | 11 (9)  | 3               | 8 (12)  |
| Send text messages or use Twitter on your mobile phone                                                                | 7       | 8 (5)   | 7       | 6 (5)   | 5               | 5 (7)   |
| Play computer games                                                                                                   | 8       | 4 (2)   | 6       | 8 (6)   | 6               | 4 (6)   |
| Watch TV DVDs or playbacks of programmes                                                                              | 8       | 4 (2)   | 9       | 4 (3)   | 7               | 2 (3)   |
| <b>Total of valid* responses/total responses</b>                                                                      |         | 178/210 |         | 130/210 |                 | 68/210  |

\*A valid response = each after-school leisure activity is ranked by a separate number between 1 and 10 by individual participant

**Table IV. Order of preferences and preference proportions of levels indicating the value of dance classes at t0 (week 0) and t1 (week 9) by group allocation**

| Ranking of Attributes                                                                       | <i>Level preferences</i><br><i>Preference proportions</i> <sup>1</sup>                     |                                                                                            |                                                                                            |                                                                                            |
|---------------------------------------------------------------------------------------------|--------------------------------------------------------------------------------------------|--------------------------------------------------------------------------------------------|--------------------------------------------------------------------------------------------|--------------------------------------------------------------------------------------------|
|                                                                                             | <i>Control time 0</i><br><i>(n=104/120*)</i>                                               | <i>Control time 1</i><br><i>(n=104/120*)</i>                                               | <i>Intervention time 0</i><br><i>(n=80/90*)</i>                                            | <i>Intervention time 1</i><br><i>(n=80/90*)</i>                                            |
| <b>1. Time for other activities on dance class days</b><br><br><i>2 hrs/day v 3hrs /day</i> | Having 2 hours remaining for other leisure activities on dance class days<br><br>67% v 33% | Having 3 hours remaining for other leisure activities on dance class days<br><br>35% v 65% | Having 2 hours remaining for other leisure activities on dance class days<br><br>82% v 18% | Having 2 hours remaining for other leisure activities on dance class days<br><br>68% v 32% |
| <b>2. Cost</b><br><br><i>50p v £1</i>                                                       | £1 cost<br><br>39% v 61%                                                                   | 50p cost<br><br>58% v 42%                                                                  | £1 cost<br><br>28% v 72%                                                                   | £1 cost<br><br>37% v 63%                                                                   |
| <b>3. Frequency of dance classes per week</b><br><br><i>1 p/wk v 2 p/wk</i>                 | 2 classes per week<br><br>41% v 59%                                                        | 2 classes per week<br><br>36% v 64%                                                        | 2 classes per week<br><br>38% v 62%                                                        | 2 classes per week<br><br>44% v 56%                                                        |

<sup>1</sup>Preference proportions holding all else equal, the proportion of the sample that would choose particular level over the other within that attribute  
\*Number of valid responses from total possible responses

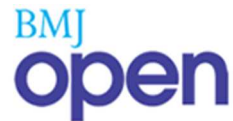

**Bristol Girls Dance Project feasibility study: using a pilot economic evaluation to inform design of a full trial**

|                                 |                                                                                                                                                                                                                                                                                                                                                                                                                                                    |
|---------------------------------|----------------------------------------------------------------------------------------------------------------------------------------------------------------------------------------------------------------------------------------------------------------------------------------------------------------------------------------------------------------------------------------------------------------------------------------------------|
| Journal:                        | <i>BMJ Open</i>                                                                                                                                                                                                                                                                                                                                                                                                                                    |
| Manuscript ID:                  | bmjopen-2013-003726.R1                                                                                                                                                                                                                                                                                                                                                                                                                             |
| Article Type:                   | Research                                                                                                                                                                                                                                                                                                                                                                                                                                           |
| Date Submitted by the Author:   | 22-Oct-2013                                                                                                                                                                                                                                                                                                                                                                                                                                        |
| Complete List of Authors:       | Powell, Jane; University of the West of England, Bristol, Health and Social Sciences<br>Carroll, Fran; University of Bristol, School of Social and Community Medicine<br>Sebire, Simon; University of Bristol, Centre for Exercise Nutrition and Health Sciences<br>Haase, Anne; University of Bristol, Centre for Exercise Nutrition and Health Sciences<br>Jago, Russ; University of Bristol, Centre for Exercise, Nutrition and Health Sciences |
| <b>Primary Subject Heading</b>: | Public health                                                                                                                                                                                                                                                                                                                                                                                                                                      |
| Secondary Subject Heading:      | Health economics, Sports and exercise medicine                                                                                                                                                                                                                                                                                                                                                                                                     |
| Keywords:                       | SPORTS MEDICINE, HEALTH ECONOMICS, PUBLIC HEALTH                                                                                                                                                                                                                                                                                                                                                                                                   |
|                                 |                                                                                                                                                                                                                                                                                                                                                                                                                                                    |

SCHOLARONE™  
Manuscripts

Only

**RESEARCH PILOT STUDY****Bristol Girls Dance Project feasibility study: using a pilot economic evaluation to inform design of a full trial**

Powell, J.<sup>1§</sup> Carroll, FE.<sup>2</sup> Sebire SJ.<sup>3</sup> Haase, AM.<sup>3</sup> Jago, R.<sup>3</sup>

<sup>1</sup> Professor of Public Health Economics, Department of Health and Social Sciences, University of the West of England, Glenside Campus, Stapleton, Bristol, BS16 1DD, UK.

<sup>2</sup> Dr Fran E Carroll, Research Assistant, School of Social and Community Medicine, University of Bristol, BS8 2PS, UK.

<sup>3</sup> Dr Simon J Sebire, Post-Doctoral Researcher, Centre for Exercise Nutrition and Health Sciences, School for Policy Studies, University of Bristol, BS8 1TZ, UK.

<sup>3</sup> Dr Anne M Haase, Senior Lecturer in Exercise, Nutrition & Health, Centre for Exercise, Nutrition and Health Sciences, School for Policy Studies, University of Bristol, BS8 1TZ, UK.

<sup>3</sup> Professor Russell Jago, Professor of Paediatric Physical Activity & Public Health Exercise, Nutrition & Health Sciences, Centre for Exercise, Nutrition & Health Sciences, School for Policy Studies, University of Bristol, BS8 1TZ, UK.

<sup>§</sup> Corresponding author Professor Jane Powell, Department of Health and Social Sciences, University of the West of England, Bristol, BS16 1DD, UK. 0044 117 3288752

## ABSTRACT

Wider context: There is currently little guidance for pilot trial economic evaluation where health outcomes and costs are influenced by a range of wider determinants and factors.

Objectives: This paper presents the findings of a pilot economic evaluation study running alongside the Bristol Girls Dance Project (BGDP) feasibility study.

Design: Three-arm, cluster randomised, controlled pilot trial and economic evaluation. Seven schools (n=210) from the Bristol and greater Bristol area, UK were randomly allocated to the intervention arm 3 schools (n= 90) and the control arms 4 schools (n=120).

Intervention: Girls aged 11-12 years with parental consent were provided with two, 90-minute dance sessions per week for 9-weeks at school facilities.

Economic outcome measures: Programme costs and girls' preferences for attributes of dance and preferences for competing leisure time activities were measured.

Results: The mainstream average cost of the BDGP programme (not including research, control and dance teacher training costs) per school was \$2,126.40; £1,329; €1,555 and per participant \$70.90; £44.31; €51.84 in 2010-11 prices. Discrete Choice Experiment (DCE) methods are acceptable to girls of this age indicating time available for other leisure activities on dance class days is the attribute girls valued most and 2 hours leisure time remaining preferred to 3 hours.

Conclusions: This pilot study indicates providing full cost data for a future trial of the BGDP programme is feasible and practical. There is no evidence from preference data to support adjustment to intervention design. A future economic evaluation is likely to be successful utilising the resource use checklist developed. The importance of categorising separately

1  
2  
3 resources used to develop, prepare, deliver and maintain the programme to estimate  
4  
5 mainstream costs accurately is demonstrated.  
6  
7

### 8 *Strengths and limitations of this study*

9

10  
11 This pilot study used a systematic approach where there is currently minimal evidence to  
12  
13 determine the costs of implementing a pilot dance intervention in girls 11-12 years old. The  
14  
15 study has produced findings about girls' preferences for dance and an embryonic costing tool  
16  
17 that can be applied to design and conduct an economic evaluation alongside a full cluster  
18  
19 RCT. This feasibility and exploratory pilot study is powered to test the intervention concept,  
20  
21 the feasibility of obtaining programme cost data in categories and the evidence required to  
22  
23 power a full cluster RCT in the future. Consequently, the variation in programme costs at the  
24  
25 school level has not been captured and this is a limitation of the cost estimates presented.  
26  
27  
28  
29  
30  
31  
32

## 33 **BACKGROUND**

34  
35  
36

37 Recent influential studies attach substantial economic and social costs to obesity prevalence  
38  
39 projections.<sup>1 2</sup> These forecasts are based upon a body of research from long term cohort  
40  
41 studies which suggest that change in the prevalence of obesity in children and adolescents  
42  
43 born at the millennium is likely to lead to increased health risks in middle-age irrespective of  
44  
45 adult adiposity.<sup>3 4 5</sup> Consequently, there is a need for new interventions that focus on  
46  
47 preventing obesity or changing diet or physical activity; the two behaviours that are central to  
48  
49 the accrual of body mass.  
50  
51

52  
53 As well as being a health and wellbeing issue, children's obesity also has serious economic  
54  
55 impacts. Scarce resources with competing uses in all health systems and the need to decide  
56  
57  
58  
59  
60

1  
2  
3 between new, 'efficacious' primary prevention physical activity programme interventions on  
4  
5 the grounds of cost-effectiveness, has increased the significance of economic evaluation as a  
6  
7 concept and methodology. Recent guidance from the UK Medical Research Council (MRC)  
8  
9 for the development and evaluation of complex behavioural interventions suggests that  
10  
11 efficacy and cost-effectiveness should be established before programmes are implemented at  
12  
13 the population level.<sup>6 7</sup> However, the meaningful determination of these criteria is often  
14  
15 problematic in primary prevention and guidelines for the design and conduct of economic  
16  
17 evaluation of complex interventions are at an early stage of development.<sup>8 9 10 11</sup> It is therefore  
18  
19 important to develop the conceptual and measurement process by which effectiveness and  
20  
21 cost-effectiveness of complex physical activity interventions can be evaluated in a full trial  
22  
23 using a pilot study.  
24  
25  
26

27  
28 The main findings of the Bristol Girls Dance Project (BGDP) feasibility trial concerning  
29  
30 process evaluation, outcomes and effectiveness have been published elsewhere.<sup>12</sup> This part  
31  
32 of the study suggested that it is feasible to deliver the intervention and that participating in  
33  
34 dance has the potential to yield change in moderate to vigorous physical activity (MVPA)  
35  
36 among 11-12 year old girls (school year 7), but a larger randomised controlled trial (RCT)  
37  
38 would be needed to fully evaluate its effectiveness and cost-effectiveness.<sup>12</sup> In the absence  
39  
40 of robust evidence for the cost and outcome of dance interventions, other aims of the  
41  
42 feasibility pilot were to refine the information required to sufficiently power a full trial and to  
43  
44 use the preference data to inform potential refinements to intervention design.  
45  
46  
47

48  
49 Preferences for competing after-school activities are potential determinants of the economic  
50  
51 benefit of dance intervention, as increased physical activity must be valued in order for it to  
52  
53 be maintained<sup>8</sup> and to have potential for long-term impact on physical activity levels. In this  
54  
55 study, Discrete Choice Experiment (DCE) and survey methods are applied to examine two  
56  
57 separate, but complementary aspects of value – preferences for the attributes of dance classes  
58  
59  
60



1  
2  
3 and preferences for dance among other competing alternatives for spending leisure time  
4 respectively. Physical activity levels decline during youth<sup>13</sup> with the start of secondary  
5 school being a critical period of change, so it was important to establish comparative  
6 preferences for after-school, leisure activities on weekdays.  
7  
8  
9  
10

11  
12 Value is a concept germane to recruitment and retention rates and linked to the outcome  
13 dimension of the BGD intervention and therefore important to examine in detail. DCE  
14 works on the premise that any 'product', for example a healthcare treatment or physical  
15 activity programme, can be described by its characteristics, or attributes, and the extent to  
16 which an individual values a 'product' is dependent on the level of these characteristics.<sup>14 15</sup>  
17  
18  
19  
20  
21  
22

23  
24  
25  
26  
27  
28  
29  
30  
31  
32  
33  
34  
35  
36  
37  
38  
39  
40  
41  
42  
43  
44  
45  
46  
47  
48  
49  
50  
51  
52  
53  
54  
55  
56  
57  
58  
59  
60

16  
Thus, this paper reports the findings of a pilot economic evaluation of the Bristol Girls Dance  
Project for girls aged 11-12 years in a primary school setting in England that can be applied  
to design and conduct a future full trial and economic evaluation.

## ARTICLE SUMMARY

### *Article focus*

To examine whether the proposed methods for collection of resource use data for estimating  
the costs are feasible, practical and likely to be successful in full trial economic evaluation.

To understand preferences for after-school dance classes in the context of weekday leisure  
time at age 11-12 years that can be applied to inform intervention design.

### *Key messages*

Time available for other leisure activities on dance class days is an attribute of after school dance classes girls aged 10-11 years valued most - followed by cost and frequency of dance classes per week.

2 hours available for other leisure activities on dance class days was preferred to 3 hours suggesting after-school dance classes are valued compared with other ways to spend leisure time after school on weekdays

Resources used in the development, preparation, delivery and maintenance of dance classes should be categorised separately in stages in order to identify the mainstream cost of the programme intervention to commissioners

## **METHODS**

### *Bristol Girls Dance Project (BGDP) feasibility study*

BGDP was a three-arm, parallel group, cluster randomised, controlled pilot trial with schools as the unit of allocation. Seven schools from three school districts, Bristol, Bath and South Gloucestershire (UK) were recruited to take part in the study from schools in these districts with no current after school dance provision.<sup>12</sup> The hip-hop and street dance style of dance to popular music was facilitated by a professional dance teacher.

Stratifying by school district, three schools were randomly allocated to the intervention arm (n= 90) and four schools to the two control arms (n=120) and each school was assigned a dance teacher to lead the sessions. Randomisation was conducted by an independent member of the clinical trials unit at Bristol University using computer-generated random sequences and codes for school district and school name. The three intervention schools received two,

1  
2  
3 90-minute after-school dance classes per week for 9 weeks selected to allow the entire  
4 programme to be delivered within a school term. Pilot work had suggested that dance is a  
5 very attractive form of PA for girls, so the control element was designed to ascertain whether  
6 offering a dance workshop at the end of the research process (i.e., after the last data  
7 collection), would affect either retention or the quality of data provided by participants. We  
8 therefore utilized a three-arm design with two different control groups. In two schools,  
9 participants were provided with small thank you gifts for each wave of data collection. In the  
10 other two control schools participants were provided with the same small thank you gifts, as  
11 well as a half-day dance workshop at the end of the study.  
12  
13  
14  
15  
16  
17  
18  
19  
20  
21  
22  
23  
24

### 25 *Sample size*

26  
27 This feasibility study was powered to test the intervention concept and to provide the  
28 necessary information to calculate the sample size of a full cluster RCT and economic  
29 evaluation of an after school dance programme. The important parameters detection of 10  
30 minutes difference in MVPA per weekday (50 minutes per week) between the intervention  
31 and control groups, intra-class correlation for weekday MVPA at time 2 and associated  
32 confidence intervals have been reported and profiled in another paper from this study.<sup>12</sup> For  
33 practical reasons the sample was limited to thirty girls aged 11-12 years per school. Girls  
34 were recruited from each school at random from those with parental consent.  
35  
36  
37  
38  
39  
40  
41  
42  
43  
44  
45  
46  
47  
48  
49  
50  
51  
52  
53  
54  
55  
56  
57  
58  
59  
60

1  
2  
3 *Economic measures*  
4

5  
6 1) *Discrete Choice Experiment (DCE) and survey of preference ranking and use of*  
7  
8 *leisure time*  
9

10  
11  
12 BGDG formative qualitative work indicated the frequency of after-school dance classes per  
13 week, cost per session and how much leisure time is left over on dance class days for other  
14 leisure activities are important considerations for girls in deciding whether to participate.<sup>17</sup>  
15  
16 Participants were asked to select the 'dance class scenario' they preferred from a pair of  
17 options. Table I presents the 4 paired scenarios (1A:1B, 2A:2B, 3A:3B, 4A:4B) consisting of  
18 a randomly determined combination of three attributes, each with two levels.  
19  
20  
21  
22  
23  
24

25  
26  
27 Table I  
28

29  
30  
31 Four paired choice scenarios were administered to 210 girls in seven schools - 3 intervention  
32 schools (n=90) and 4 control schools (n=120). Measures were taken at baseline (time 0) and  
33 at 9 weeks (time 1) using large cards, and girls' preferred choice for each pair of scenarios  
34 was recorded by the project team. Two time points were needed to establish change in  
35 preferences before and after the intervention. Participants were also asked to give preference  
36 ratings for ten leisure activities on weekdays by survey using a ten-point scale (1 = favourite;  
37 10 = least favourite). Participant responses were collected on Personal Digital Assistants  
38 (PDAs) and downloaded to a customised database.  
39  
40  
41  
42  
43  
44  
45  
46  
47  
48

49  
50  
51 2) *Resource use-cost*  
52

53  
54 At commencement of this pilot study there was minimal evidence on which to draw in  
55 identifying costs that might be included in a resource use checklist. One report from the  
56 National Institute for Health and Clinical Excellence (NICE) had modelled the cost of  
57  
58  
59  
60

1  
2  
3 delivering dance classes to young children and produced some ball park cost estimates.<sup>18 19</sup>  
4  
5 These were based on an account of the resources used in delivery of a dance programme for  
6  
7 girls by Hampshire Dance and Laban<sup>20</sup> in which resources had been identified, but not  
8  
9 costed. These uncontrolled studies provided a starting point and an opportunity to produce  
10  
11 more complete and accurate costing data from the Bristol Girls Dance Project feasibility pilot  
12  
13 trial in which the volume of resources used and prices could be treated separately. The cost  
14  
15 items identified by NICE were entered into a database and data collected using time-sheets  
16  
17 and expense sheets were collected by the project team. These cost estimates and some  
18  
19 estimates for teacher time to manage behaviour derived by the first author of this paper are  
20  
21 detailed in Table II.<sup>18 19 20</sup> Table II was used as a template for identifying and costing  
22  
23 resources in the BGDG feasibility study.  
24  
25  
26  
27  
28

29 TABLE II here  
30  
31  
32

### 33 *Ethics*

34  
35  
36 Potential participants in all seven schools were told that there was a maximum of 30  
37  
38 randomly assigned spaces at the dance classes. The study was approved by a University of  
39  
40 Bristol ethics committee and informed parental consent was obtained for all participants.  
41  
42  
43

### 44 *Analyses*

45  
46  
47  
48 Proportions of the sample ranking ten weekday leisure activities as first choice activity (rank  
49  
50 = 1) were calculated after participants had rated all ten leisure activities from 1 to 10.  
51

52  
53 Responses from participants with repetition of ratings for one or more leisure activities or  
54  
55 missing ratings for leisure activities were excluded. Overall, where the proportion of the  
56  
57 sample rating activities as their first choice was the same, these activities were assigned the  
58  
59  
60

1  
2  
3 same rank across all ten activities. DCE data was ‘effects-coded’<sup>21</sup> using STATA<sup>22</sup> and  
4  
5 analysed using conditional logistic regression. Effects coding is similar to dummy variable  
6  
7 coding, but is preferable in this instance because interaction or trade-off between the  
8  
9 attributes is likely to take place as well as a main effect. The coefficients for each attribute are  
10  
11 a measure of the influence of that attribute level on choice. Positive values represent a  
12  
13 positive influence on choice, or in other words, a preference for that level of an attribute.  
14  
15 These results can be used to establish girls’ overall preferences for attributes, as well as the  
16  
17 order of their preferences (i.e. which attribute is most and least important). Participants with  
18  
19 missing data were excluded from the DCE analysis.  
20  
21  
22  
23  
24

25 Total and average cost estimates from a funder perspective were identified and derived for  
26  
27 BGDG based on staged timing, quantity, frequency and price of resource use in 2010-11  
28  
29 prices. Expenses including travel, intervention programme entry incentives, postage,  
30  
31 Criminal Records Bureau (CRB) applications were accessed from the database kept by the  
32  
33 project team. Girls in the control schools received small thank you gifts at each data  
34  
35 collection they attended. Space hire did not incur costs, but estimates of the cost of space  
36  
37 hire for dance class delivery are included because they are costs connected with alternative  
38  
39 use of space in schools. School overhead and capital costs are not included.  
40  
41  
42  
43  
44

45 Grouping costs to enable estimation of the mainstream cost adopted the categories used in (A  
46  
47 Stop Smoking in Schools Trial) ASSIST.<sup>23</sup> Stage 0 intervention planning, development and  
48  
49 training costs, stage 1 intervention preparation, stage 2 intervention delivery and stage 3  
50  
51 intervention maintenance costs were separately identified. Training costs for dance teachers  
52  
53 are identified separately. Costs associated with running the research study, control group  
54  
55 incentives for data collection, control school dance workshops and recruitment events) would  
56  
57  
58  
59  
60

1  
2  
3 not recur during mainstream implementation, but these costs are included for clarity and  
4  
5 completeness. All costs connected with tasks undertaken by the research team are not  
6  
7 included.  
8  
9

## 10 11 12 **RESULTS**

### 13 *Identification and timing of resources used*

14  
15  
16  
17 Table III identifies and describes at four stages the resources use of the BGDG programme  
18  
19 and presents total cost estimates. The proportion of total costs incurred were 41% at stage 0,  
20  
21 7% at stage 1, 46% at stage 2 and 6% at stage 3. At stage 0 half of the costs are dance  
22  
23 teacher preparation and training time which arguably would be incurred in part in delivery of  
24  
25 a mainstream form of the programme. Eighteen BGDG dance classes (2 classes per week for  
26  
27 9 weeks) of 90 minutes duration were delivered to 90 girls in three intervention schools (30  
28  
29 per school) for 81 hours (27 hours per school) at a total estimated cost \$6,380, £3, 988,  
30  
31 €4,666 in 2010-11 prices.<sup>24 25</sup> The average cost of the BDGP programme in its mainstream  
32  
33 form per school was \$2,126.40; £1,329; €1,555 and per participant \$70.90; £44.31; €51.84 in  
34  
35 2010-11 prices. If training costs for dance teachers on the BGDG were included to the  
36  
37 mainstream cost this would add \$1280; £800; €928 to the cost per school and \$43; £27;  
38  
39 €31.60 to the cost per pupil. These are not insubstantial additions, but are at the high end of  
40  
41 training costs because this new dance programme was properly prepared for delivery.  
42  
43  
44 Training costs for the delivery of an established dance programme are likely to be lower. It  
45  
46 was not possible to calculate confidence intervals for average programme costs per school or  
47  
48 per participant (see limitations of this pilot study).  
49  
50  
51  
52  
53  
54

55 Table III here  
56  
57  
58  
59  
60

1  
2  
3 The shorter and less intensive NRG programme costed in the NICE report <sup>19</sup> comprised 10  
4 dance classes of 60 minutes duration for 24 girls (an assumed number) in 14 groups or  
5 schools (n=336 girls) for 140 hours with a cost per participant of \$98.14; £61.31; €71.81, in  
6  
7  
8  
9  
10 2010-11 prices. This includes 140 hours of teacher time sourced from national pay scales for  
11  
12 England at £23.57 per hour at 2010-11 prices.<sup>26</sup>  
13

### 14 15 16 *Preferences for leisure activities* 17

18  
19 All girls were asked to rank ten after-school leisure activities by first preference activity.  
20  
21 Table III presents proportions across the participants (n=210) for preference ranks for after-  
22 school leisure activities for all group allocations at each time point demonstrating consistency  
23 in preference ranks indicating girls' selection of first choice leisure activities at each time  
24 point. The after-school leisure activities indicating the highest proportion of first choice  
25 preference rankings at each time point include 'hanging out with friends away from home just  
26 for fun' (Ranking at t2=1, t1=1, t0=2); 'take part in sports, athletics or physical activity'  
27 (Ranking at t2=2, t1=2, t0=1) and 'using the internet for fun: chats, YouTube, Facebook,  
28 Bebo, Myspace, looking for music' (Ranking at t0=3, t1=3, t2=2). Valid responses were  
29 included in the analyses. Valid responses as a proportion of total responses for the survey  
30 ranking leisure activities were t2=178/210, t1=130/210, t0=68/210 across all group  
31 allocations indicating particularly at baseline the participants experienced some problems  
32 using a hand held PDA to rank and rate the weekday after-school leisure activities.  
33  
34  
35  
36  
37  
38  
39  
40  
41  
42  
43  
44  
45  
46  
47  
48

49 Table IV here  
50  
51  
52  
53  
54

### 55 *DCE results* 56 57 58 59 60



1  
2  
3 The p values for the regression coefficients in Table IV indicate girls in this sample have a  
4 preference for “time left for other leisure activities on dance class days”, over the “cost of”  
5 and “frequency of dance classes per week”. Analysis of preference levels within each  
6  
7 attribute suggests 2 hours is preferred to 3 hours remaining for other leisure activities on  
8  
9 dance class days. This pattern was consistent in all intervention and control groups at t0 and  
10  
11 t1. Girls were least concerned with the frequency of dance classes per week with preference  
12  
13 proportions suggesting 2 classes were preferred to 1 dance class per week in both intervention  
14  
15 groups and the baseline control group.  
16  
17  
18  
19  
20  
21  
22

23 Table V here  
24  
25  
26

## 27 **DISCUSSION**

### 28 *What is already known on this topic*

29  
30  
31  
32 There is minimal guidance to support how economic evaluations of complex public health  
33  
34 interventions should be designed and conducted in school and community settings.  
35  
36

37  
38 There are no checklists or tools available to support costing dance programmes and minimal  
39  
40 knowledge of how to categorise resources to identify the mainstream cost of delivery.  
41  
42

43 Discrete Choice Experiment (DCE) methods to elicit the relative preferences and choices of  
44  
45 girls aged 11-12 years are untried and untested, but it is important to capture how girls value  
46  
47 dance among other competing leisure activities using a robust and acceptable method.  
48  
49

### 50 *What this study adds*

51  
52  
53  
54  
55  
56  
57  
58  
59  
60

1  
2  
3 Providing programme cost data for a full trial of the BGDG programme is feasible, practical  
4 and likely to be successful. Around two-thirds of resources are development and research  
5 control costs, so resources used to develop, prepare and deliver these programmes should be  
6 categorised separately, so the cost of the mainstream programme can be estimated accurately.  
7  
8

9  
10  
11  
12 Discrete Choice Experiment is an acceptable method to elicit preferences of girls aged 11-12  
13 years.  
14

15  
16  
17  
18 At this point in their lives after-school dance is an activity valued by girls when offered  
19 within the context of other competing choices and parental support for activities for spending  
20 leisure time after school on weekdays.  
21  
22

23  
24  
25 Participation in after-school dance classes has opportunity costs for participants and parents  
26 extending beyond the funder that suggest a social model of cost should be considered for to  
27 capture the costs associated with intervention outcome.  
28  
29

30  
31  
32  
33 Robust evidence for the cost-effectiveness of physical activity complex interventions is  
34 important for knowing where to invest scarce resources and commission programmes to  
35 maximise health outcomes in primary prevention.<sup>27 28 29</sup> However, gathering robust evidence  
36 to support investment in public health interventions is a challenge.<sup>30 31</sup> Significant barriers  
37 remain and there is currently little guidance in how to conduct economic evaluation where  
38 behaviour change is associated with health outcomes determined beyond genetic inheritance  
39 by family, social and physical environments.<sup>32 33</sup>  
40  
41  
42  
43  
44  
45  
46  
47  
48

49  
50 Indicative programme cost data from the pilot economic evaluation indicated a substantial  
51 proportion of the intervention programme costs 41% occur at Stage 0 – the pre-programme  
52 development stage. This is an important finding because it suggests provided BGDG is  
53 effective and cost-effective in a full trial, it would be substantially less costly to roll out in its  
54  
55  
56  
57  
58  
59  
60

1  
2  
3 mainstream form. All complex interventions in primary prevention are likely to generate a  
4  
5 high proportion of upfront development costs that will not reoccur once a programme is  
6  
7 mainstreamed – an aspect of investment in public health interventions often overlooked by  
8  
9 decision makers.  
10

11  
12  
13  
14 Application of DCE is an established technique in adult populations, but to our knowledge  
15  
16 has not been applied previously in populations of children aged 11-12 years to establish  
17  
18 values for the attributes of physical activities. This study has demonstrated application of  
19  
20 DCE methods is feasible and acceptable to girls of this age. This is important because it  
21  
22 suggests DCE could be applied in other studies with children to understand the concept of  
23  
24 ‘value’ of an activity which plays an important role in recruitment, participation and  
25  
26 maintenance of participants which are all linked to intervention outcome. In addition to its  
27  
28 acceptability in this study the DCE method has produced more complete and valid data than  
29  
30 the direct survey method in eliciting preference ranks for after-school leisure activities. These  
31  
32 findings support a previous contention that DCE techniques may have merit over more  
33  
34 ‘traditional’ survey methods<sup>34</sup> in eliciting preferences. However, more evidence would be  
35  
36 required to fully support this finding.  
37  
38  
39  
40  
41

42 Taken together, findings of the DCE and survey of leisure activity preference in this study  
43  
44 indicate dance is a valued leisure activity among competing alternatives and reveals more  
45  
46 about the attributes of dance classes in girls of this age that can be taken forward to maximise  
47  
48 recruitment and retention in the BGDG programme. The findings of this study suggest that  
49  
50 dance has immediate appeal as an after-school leisure activity among a range of strongly  
51  
52 competing alternatives in girls of this age compared with older adolescents.<sup>35</sup> Girls in this  
53  
54 study have a first rank preference for the attribute ‘time remaining for other leisure activities  
55  
56 on dance class days’, over the ‘cost of’ and ‘frequency of dance classes per week’. The  
57  
58  
59  
60

1  
2  
3 finding that in the intervention group two hours is preferred to three hours remaining for  
4 other leisure activities on dance class days is significant. Overall these findings could suggest  
5 that at this point in their lives dance is valued by girls as a physical and social activity when  
6 offered within the context of competing and constrained choices for spending leisure time at  
7 this age. For example, at this age girls are not likely to be able to go to 'discos or dance  
8 classes' without parents or carers or to 'hang around on street corners with friends' and these  
9 issues may have affected their responses in the survey. These are important findings because  
10 they predict positive recruitment rates and participation of girls aged 11-12 years in dance as  
11 a physical leisure time activity and in a full trial.<sup>36</sup>  
12  
13  
14  
15  
16  
17  
18  
19  
20  
21  
22  
23

24 Delivery of after-school dance classes is dependent upon substantial commitment from the  
25 girls giving up their after-school leisure time to participate in dancing. In turn, participation  
26 is dependent upon the willingness of parents and carers to support attendance and to provide  
27 encouragement and a means of travelling back home after school hours when school buses  
28 are not available. This pilot study suggests development of a social model of costing that  
29 reflects the cost of participants' and parents' time and opportunity costs are substantial  
30 elements of the intervention cost that could be captured, if practical, in a full trial.  
31  
32  
33  
34  
35  
36  
37  
38  
39

40 However, methods and tools to capture 'hidden' cost items that facilitate the success of the  
41 intervention, but are not incurred by funders are not yet fully established.<sup>23</sup> Where to  
42 include training costs in these metrics is a question that remains for a future trial as they  
43 should arguably be included in mainstream cost estimation despite their categorisation as  
44 development costs. How identification of costs falling outside the public sector that are  
45 relevant to programme implementation can be captured at a full trial stage also needs to be  
46 considered carefully.<sup>37</sup> In a full trial resources used should be captured prospectively<sup>38</sup> and  
47 this pilot study has established categories of resource use are also important to consider to  
48 establish accurate mainstream programme costs.  
49  
50  
51  
52  
53  
54  
55  
56  
57  
58  
59  
60

## CONCLUSIONS

The feasibility of providing costing data for full trial of the BGDG programme in is established and an embryonic resource use checklist has been developed. Resources used to develop and run the BGDG programme should be categorised separately in order for the mainstream delivery cost of BGDG to be estimated accurately in a full trial. A social model of costing that reflects participants and parents opportunity costs should be considered. BGDG after-school dance classes have potential for sustained participation and cost-effective delivery, but a full trial using methodological learning from this study is required.

### Competing interests

There are no competing interests.

### Authors' Contributions

The quantitative analysis plan was conceived by JP, FC, RJ and SJS. Analyses were performed by JP and FC and interpretation by JP, FC, RJ, SJS and AMH. JP drafted the first version of the manuscript with additional sections provided by FC. All authors provided critical edits and revisions to the paper and have reviewed and approved the final version of the paper.

**Data sharing statement** No additional data are available

## Funding

This research was funded by the National Prevention Research Initiative (<http://npri.org.uk>), consisting of the following funding partners: Alzheimer's Research Trust; Alzheimer's Society; Biotechnology and Biological Sciences Research Council, British Heart Foundation; Cancer Research UK; Chief Scientist Office; Scottish Government Health Directorate; Department of Health; Diabetes UK; Economic and Social Research Council; Engineering and Physical Sciences Research Council; Health & Social Care Research & Development Office for Northern Ireland; Medical Research Council; The Stroke Association; Welsh Assembly Government and World Cancer Research Fund [grant number G090084].

## Acknowledgments

We would like to thank all the participants, dance teachers, school teachers and schools who participated in or assisted with this research. Professor Powell acknowledges discussion of and feedback from a draft version of this paper presented at the Health Economists Bristol (HEB) journal club <http://www.bris.ac.uk/social-community-medicine/centres/healthecon> in November 2011. Laura Davis project manager BGDG and Jade McNeil research associate are acknowledged for data collection leading to this paper. Fran Carroll's contemporaneous PhD research was supervised by Dr Alan A Montgomery at the time of DCE design and data analysis. Dr Jago is supported by a National Institute for Health Research career development fellowship. This work was also supported by DECIPHer, a UKCRC Public Health Research: Centre of Excellence. Funding from the specific funders under the auspices of the UK Clinical Research Collaboration is gratefully acknowledged. The other co-applicants of the main BGDG study, Professor Ashley R Cooper and Dr Alan A Montgomery are acknowledged. The views expressed in this publication are those of the authors and not

1  
2  
3  
4  
5  
6  
7  
8  
9  
10  
11  
12  
13  
14  
15  
16  
17  
18  
19  
20  
21  
22  
23  
24  
25  
26  
27  
28  
29  
30  
31  
32  
33  
34  
35  
36  
37  
38  
39  
40  
41  
42  
43  
44  
45  
46  
47  
48  
49  
50  
51  
52  
53  
54  
55  
56  
57  
58  
59  
60

necessarily those of the NHS, the National Institute for Health Research or the Department of Health.

For peer review only

## References

1. Foresight. *Tackling obesities: future choices*. London: Government Office for Science, 2007.
2. Stamatakis E, Zaninotto P, Falaschetti E, Mindell, J. Head J. Time trends in childhood and adolescent obesity in England from 1995 to 2007 and projections of prevalence to 2015. *J Epidemiol Community Health* 2010; **64**:167-174.
3. Gunnell D, Frankel S, Nanchahal K, et al Childhood obesity and adult cardiovascular mortality: a 57 year follow-up study based on the Boyd Orr cohort. *Am J Clin Nutr* 1998; **67**:1111-18.
4. Must A, Jacques PF, Dallal GE, et al. Long term morbidity and mortality of overweight adolescents – a follow-up of the Havard growth study of 1922 to 1935. *N Engl J Med* 1992; **327**:1350-5.
5. Engeland A, Bjorge T, Sogaard AJ, et al. Body mass index in adolescence in relation to total mortality: 32-year Follow-up of 227,000 Norwegian boys and girls. *Am J Epidemiol* 2003; **157**:517-23.
6. Lancaster GA, Dodd S, Williamson P. Design and analysis of pilot studies: recommendations for good practice. *J Eval Clin Pract* 2004, **10**, 2:307-312.



- 1  
2  
3  
4  
5 7. Craig P, Dieppe P, Macintyre S, Michie S, Nazareth I, Petticrew M. Developing and  
6  
7 evaluating complex interventions: the new Medical Research Council guidance. *BMJ*  
8  
9 2008, 337:a1655.  
10  
11
- 12  
13  
14 8. Wolfenstetter SB. Conceptual framework for standard economic evaluation of  
15  
16 physical activity programmes in primary prevention. *Prev Sci.*2011; 12(4):435-51.  
17  
18  
19
- 20  
21 9. Sheill, A. Hawe, P. Gold, L. Complex interventions or complex systems? Implications  
22  
23 for health economic evaluation. *BMJ*, 2008; 336:1281-1283.  
24  
25
- 26  
27 10. Weatherly H, Drummond M, Claxton K, et al. *Assessing the challenges of applying*  
28  
29 *standard methods of economic evaluation to public health interventions*. York: Centre  
30  
31 for Health Economics, 2009.  
32  
33
- 34  
35 11. Anderson R. Systematic reviews of economic evaluations: utility or futility. *Health*  
36  
37 *Econ*, 2010;19:350-364.  
38  
39
- 40  
41 12. Jago R. Sebire S, Cooper AR, et al. Bristol Girls Dance Project Feasibility Trial:  
42  
43 Outcome and process evaluation results. *Int J Behav Nutr Phys Act*, 2012; 9, 83.  
44  
45
- 46  
47 13. Gorely T, Marshall S, Biddle SJH, Cameron N. The prevalence of leisure time  
48  
49 sedentary behaviour and physical activity in adolescent girls: An ecological  
50  
51 momentary assessment approach. *Int J Pediatr Obes*, 2007; 2:227-234.  
52  
53  
54  
55  
56  
57  
58  
59  
60

- 1  
2  
3  
4  
5  
6  
7  
8  
9  
10  
11  
12  
13  
14  
15  
16  
17  
18  
19  
20  
21  
22  
23  
24  
25  
26  
27  
28  
29  
30  
31  
32  
33  
34  
35  
36  
37  
38  
39  
40  
41  
42  
43  
44  
45  
46  
47  
48  
49  
50  
51  
52  
53  
54  
55  
56  
57  
58  
59  
60
14. Cheraghi-Sohi S, Bower P, Mead N, McDonald R, Whalley D, Roland M. Making sense of patient priorities: applying discrete choice methods in primary care using 'think aloud' technique. *Fam Pract*, 2007; 24: 276-282.
15. Green C, Gerard K. Exploring the social value of health-care interventions: a stated preference discrete choice experiment. *Health Econ*, 2009; 18:951-976.
16. Petrou S, McIntosh E. (2009) Women's Preferences for Attributes of First-Trimester Miscarriage Management: A Stated Preference Discrete-Choice Experiment. *Value Health*, 12,4:551-559.
17. Jago, R. Davis, L. McNeil, J. et al. Adolescent girls' and parents' views on recruiting and retaining girls into an after-school dance intervention: implications for extra-curricular physical activity provision. *Int J Behav Nutr Phys Act*, 2011, 8, 91.
18. Fordham R, Barton GP. *Promotion of physical activity in children programme guidance: a cost-effectiveness scenario analysis*. London:NICE, 2008.
19. NICE public health guidance 17. *Promoting physical activity, active play and sport for pre-school and school-age children and young people in family, pre-school, school and community settings*. NICE:London, 2009.
20. Hampshire Dance and Laban (2007)[online] Accessed on December 7<sup>th</sup> 2012. *NRG Youth Dance and Health Report 2005-6*.  
<http://www.hampshiredance.org.uk/documents/NRGEvaluationReport.pdf>

- 1  
2  
3 21. Bech, M. Gyrd-Hansen, D.. Effects coding in discrete choice experiments. *Health*  
4  
5 *Econ*, 2005; 14,10.  
6  
7  
8  
9  
10 22. STATA CORP LP (2009) *STATA user's guide release 11*. Texas, USA: STATA CORP  
11 LP.  
12  
13  
14  
15 23. Hollingworth W, Cohen D, Hawkins J, et al. Reducing smoking in adolescents: cost-  
16 effectiveness results from the cluster randomised ASSIST (A Stop Smoking in  
17 Schools Trial). *Nicotine & Tob Res*, 2011; 14, 2:161-168.  
18  
19  
20 24. Safalra [online] 2012. *Historical UK Inflation and price conversion rates*. Accessed  
21 on May 3<sup>rd</sup> 2012 at:- <http://safalra.com/other/historical-uk-inflation-price-conversion/>.  
22  
23  
24  
25  
26  
27 25. Oanda [online] 2012. *Historical exchange rates*. Accessed on May 3<sup>rd</sup> 2012 at:-  
28 <http://www.oanda.com/currency/historical-rates/>.  
29  
30  
31  
32  
33 26. TES [online] 2011 *Teacher's pay scales from September 2011 unchanged from 2010*.  
34 <http://www.tes.co.uk/article.aspx?storycode=6000186>  
35  
36  
37  
38  
39  
40 27. Rush B, Sheill A, Hawe P. A census of economic evaluations in health promotion.  
41 *Health Educ Res*, 2004; 19:707-719.  
42  
43  
44  
45  
46 28. Kelly MP, McDaid D, Ludbrook A, Powell JE. *Economic appraisal of public health*  
47 *interventions*. London:Health Development Agency, 2005.  
48  
49  
50  
51  
52 29. Anderson R. New MRC guidance on evaluating complex interventions. *BMJ*,  
53 2008;337:944-5.  
54  
55  
56  
57  
58  
59  
60

- 1  
2  
3 30. Buchanan J, Wolstenholme J, Foster C. *A rapid review of economic literature related*  
4  
5 *to the promotion of physical activity, play and sport for pre-school and school-age*  
6  
7 *children in family, pre-school, school and community settings*. London:NICE, 2008.  
8  
9  
10 31. Richardson AK. Investing in public health: barriers and possible solutions. *J Public*  
11  
12 *Health* 2012; 34:322-7.  
13  
14  
15  
16 32. Ogilvie D, Bull F, Powell J, et al. An applied ecological framework for evaluating  
17  
18 infrastructure to promote walking and cycling: the iConnect study. *Am J Public*  
19  
20 *Health*. 2011;101:473-481.  
21  
22  
23  
24  
25 33. Powell J. Compression of morbidity outcomes key to investment in public health. *J*  
26  
27 *Public Health* 2012; 34:329.  
28  
29  
30  
31  
32 34. Alvarez-Farizo B, Hanley N, Barberan R. The value of leisure time: a contingent  
33  
34 rating approach, *J Environ Plan Man*, 2001; 44(5):681-699.  
35  
36  
37 35. O'Neill, J. Pate, R. Hooker, SP. The contribution of dance to daily physical activity  
38  
39 among adolescent girls. *Int J Behav Nutr Phys Act*, 2011; 8:87.  
40  
41  
42  
43 36. Nader PR, Bradley RH, Houts RM, McRitchie SL, O'Brien M: Moderate-to-vigorous  
44  
45 physical activity from ages 9 to 15 years. *JAMA* 2008, 300:295-305.  
46  
47  
48  
49 37. Alvarez-Farizo B, Hanley N, Barberan R. The value of leisure time: a contingent  
50  
51 rating approach, *J Environ Plan Man*, 2001; 44,5:681-699.  
52  
53  
54  
55  
56  
57  
58  
59  
60

- 1  
2  
3 38. Ridyard C, Hughes D. Methods for the collection of resource use data within clinical  
4 trials: a systematic review of the studies funded by the UK Health Technology  
5 Assessment Programme. *Value Health*, 2010; 13, 8:867-872.  
6  
7  
8  
9  
10  
11  
12  
13

14 **TABLES**

15 **Table 1. Attributes and levels of the Discrete Choice Experiment and the four choice sets**  
16 **given to participants**

17  
18  
19  
20  
21  
22  
23  
24  
25  
26  
27  
28  
29  
30  
31  
32  
33  
34  
35  
36  
37  
38  
39  
40  
41  
42  
43  
44  
45  
46  
47  
48  
49  
50  
51  
52  
53  
54  
55  
56  
57  
58  
59  
60

| Level of attributes                                                                                                                                   | Attributes                          |                                                                                                                                                       |                                                                                  |
|-------------------------------------------------------------------------------------------------------------------------------------------------------|-------------------------------------|-------------------------------------------------------------------------------------------------------------------------------------------------------|----------------------------------------------------------------------------------|
|                                                                                                                                                       | Frequency of dance classes per week | Cost per session                                                                                                                                      | Hours left for other leisure activities on that day                              |
| Upper                                                                                                                                                 | 2 dance classes per week            | £1 per session                                                                                                                                        | Leaving 3 hours for other leisure activities on the evening of the dance session |
| Lower                                                                                                                                                 | 1 dance class per week              | 50p per session                                                                                                                                       | Leaving 2 hours for other leisure activities on the evening of the dance session |
| 1A<br>You take one after school dance class each week at a cost of £1 per class leaving you 3 hours on that evening for other leisure activities      |                                     | 1B<br>You take two after school dance classes each week at a cost of 50p per class leaving you 2 hours on those evenings for other leisure activities |                                                                                  |
| 2A<br>You take two after school dance classes each week at a cost of £1 per class leaving you 2 hours on those evenings for other leisure activities  |                                     | 2B<br>You take one after school dance class each week at a cost of 50p per class leaving you 3 hours on that evening for other leisure activities     |                                                                                  |
| 3A<br>You take one after school dance class each week at a cost of 50p per class leaving you 2 hours on that evening for other leisure activities     |                                     | 3B<br>You take two after school dance classes each week at a cost of £1 per class leaving you 3 hours on those evenings for other leisure activities  |                                                                                  |
| 4A<br>You take two after school dance classes each week at a cost of 50p per class leaving you 3 hours on those evenings for other leisure activities |                                     | 4B<br>You take one after school dance class each week at a cost of £1 per class leaving you 2 hours on that evening for other leisure activities      |                                                                                  |

1  
2  
3  
4  
5  
6  
7  
8  
9  
10  
11  
12  
13  
14  
15  
16  
17  
18  
19  
20  
21  
22  
23  
24  
25  
26  
27  
28  
29  
30  
31  
32  
33  
34  
35  
36  
37  
38  
39  
40  
41  
42  
43  
44  
45  
46  
47  
48  
49  
50  
51  
52  
53  
54  
55  
56  
57  
58  
59  
60

For peer review only

Table II. Resources use identification template used to inform BGDG feasibility study

| NRG Youth Dance & Health Project <sup>1</sup>                                                                                                                                                                                                                                                                                                                                                          |                           |
|--------------------------------------------------------------------------------------------------------------------------------------------------------------------------------------------------------------------------------------------------------------------------------------------------------------------------------------------------------------------------------------------------------|---------------------------|
|                                                                                                                                                                                                                                                                                                                                                                                                        | <sup>2</sup> Total Cost £ |
| Project planning work: initial research into existing action research projects                                                                                                                                                                                                                                                                                                                         | 500.00                    |
| Lead artist fee -programme design/artist training                                                                                                                                                                                                                                                                                                                                                      | 800.00                    |
| Artists' travel fees – attending training/planning sessions                                                                                                                                                                                                                                                                                                                                            | 637.35                    |
|                                                                                                                                                                                                                                                                                                                                                                                                        | 5,806.00                  |
| Artists' fee                                                                                                                                                                                                                                                                                                                                                                                           | 1,515.44                  |
|                                                                                                                                                                                                                                                                                                                                                                                                        | 562.88                    |
| Artists' travel costs                                                                                                                                                                                                                                                                                                                                                                                  | 254.70                    |
|                                                                                                                                                                                                                                                                                                                                                                                                        | 77.98                     |
| Coach hire – school group for pilot session                                                                                                                                                                                                                                                                                                                                                            | 64.03                     |
|                                                                                                                                                                                                                                                                                                                                                                                                        | 4,000.00                  |
| Space hire                                                                                                                                                                                                                                                                                                                                                                                             | 443.65                    |
|                                                                                                                                                                                                                                                                                                                                                                                                        | 269.70                    |
| Disclosures/refreshments                                                                                                                                                                                                                                                                                                                                                                               | 562.88                    |
|                                                                                                                                                                                                                                                                                                                                                                                                        | 151.80                    |
| Postage                                                                                                                                                                                                                                                                                                                                                                                                | 15,203.53                 |
|                                                                                                                                                                                                                                                                                                                                                                                                        | 3,300.00                  |
| Management fee                                                                                                                                                                                                                                                                                                                                                                                         | 19,427.76                 |
|                                                                                                                                                                                                                                                                                                                                                                                                        | 20,600.00                 |
| Staff travel                                                                                                                                                                                                                                                                                                                                                                                           |                           |
|                                                                                                                                                                                                                                                                                                                                                                                                        |                           |
| Documentation (dissemination advocacy)                                                                                                                                                                                                                                                                                                                                                                 |                           |
|                                                                                                                                                                                                                                                                                                                                                                                                        |                           |
| Road-show event – end of project                                                                                                                                                                                                                                                                                                                                                                       |                           |
|                                                                                                                                                                                                                                                                                                                                                                                                        |                           |
| Additional schools workshop                                                                                                                                                                                                                                                                                                                                                                            |                           |
|                                                                                                                                                                                                                                                                                                                                                                                                        |                           |
| Total 2005-6 prices £                                                                                                                                                                                                                                                                                                                                                                                  |                           |
|                                                                                                                                                                                                                                                                                                                                                                                                        |                           |
| Teacher time for behaviour management (not included in NRG report) <sup>3</sup>                                                                                                                                                                                                                                                                                                                        |                           |
|                                                                                                                                                                                                                                                                                                                                                                                                        |                           |
| Total 2007-8 prices £ with teacher management                                                                                                                                                                                                                                                                                                                                                          |                           |
|                                                                                                                                                                                                                                                                                                                                                                                                        |                           |
| Total 2010-11 prices £                                                                                                                                                                                                                                                                                                                                                                                 |                           |
| <sup>1</sup> resource use items identified by Hampshire Dance and Laban, NRG Youth Dance and Health Project Evaluation report <sup>20</sup><br><sup>2</sup> assumptions and costing profile produced by Fordham & Barton (2008) <sup>18</sup> for NICE Guidance 17 (NICE,2009) <sup>19</sup><br><sup>3</sup> This item was identified in the NICE report <sup>20</sup> but not costed <sup>18 19</sup> |                           |

1  
2  
3  
4  
5  
6  
7  
8  
9  
10  
11  
12  
13  
14  
15  
16  
17  
18  
19  
20  
21  
22  
23  
24  
25  
26  
27  
28  
29  
30  
31  
32  
33  
34  
35  
36  
37  
38  
39  
40  
41  
42  
43  
44  
45  
46  
47  
48  
49  
50  
51  
52  
53  
54  
55  
56  
57  
58  
59  
60

For peer review only



Table III. Description of resources used, unit volumes, prices and estimated costs\* by category by school by pupil in 2010-11 prices

| Stage of BGDG                                                                                                                               | Description of resources used                                              | Number of units <sup>1</sup> | Price per unit <sup>2</sup> | Cost £ 2010-11 prices | Cost stage     |
|---------------------------------------------------------------------------------------------------------------------------------------------|----------------------------------------------------------------------------|------------------------------|-----------------------------|-----------------------|----------------|
| Pre-Programme planning development stage 0                                                                                                  | Lead dance artist consultation and development work                        | 2 days                       | £500 per day                | 1000                  | <u>4726</u>    |
|                                                                                                                                             | Lead dance artist time, to adapt training programme for hip hop genre      | 1 day                        | £500 per day                | 500                   |                |
|                                                                                                                                             | Lead dance artist time, to prepare dance teachers for 9 week intervention  | 1 day                        | £500 per day                | 500                   |                |
|                                                                                                                                             | 3 dance teachers preparation/training time                                 | 7.5 days                     | £27 per hour                | 2400                  |                |
|                                                                                                                                             | Travel expenses                                                            |                              |                             | 288 <sup>3</sup>      |                |
|                                                                                                                                             | Disclosures CRB forms                                                      |                              |                             | 38 <sup>3</sup>       |                |
| Programme preparation stage 1                                                                                                               | Space hire for dance taster sessions in intervention schools               | 6 hours                      | £15 per hour                | 90                    | <u>819</u>     |
|                                                                                                                                             | Dance teacher delivery of taster sessions in intervention schools          | 6 hours                      | £27 per hour                | 162                   |                |
|                                                                                                                                             | Control schools (n=4) recruitment presentations                            | 1 day                        | 500 per day                 | 500                   |                |
|                                                                                                                                             | Postage costs                                                              |                              |                             | 25 <sup>3</sup>       |                |
|                                                                                                                                             | Travel expenses                                                            |                              |                             | 42 <sup>3</sup>       |                |
| Programme delivery stage 2                                                                                                                  | Delivery 18 dance classes at 90 minutes per class over 9 weeks x 3 schools | 81 hours                     | £27 per hour                | 2187                  | <u>5375</u>    |
|                                                                                                                                             | T-shirts for 3 intervention schools                                        | 90 girls                     | £5 per T-shirt              | 450                   |                |
|                                                                                                                                             | Small gift incentives for control schools data collection                  | 3 waves                      | £731 per wave               | 2192                  |                |
|                                                                                                                                             | Refreshments                                                               |                              |                             | 100 <sup>3</sup>      |                |
|                                                                                                                                             | Travel expenses                                                            |                              |                             | 446 <sup>3</sup>      |                |
| Programme reinforcement stage 3                                                                                                             | Half-day dance workshops for two control schools                           | 9 hours                      | £27 per hour                | 243                   | <u>729</u>     |
|                                                                                                                                             | 6 hour performance events for parents of girls at 3 intervention schools   | 18 hours                     | £27 per hour                | 486                   |                |
|                                                                                                                                             |                                                                            |                              |                             | Total                 | <u>£11,649</u> |
| BGDP Stages 0-3 costs £s                                                                                                                    |                                                                            | £11,649 2010-11 prices       |                             |                       |                |
| BGDP Stages 1-3 costs £s                                                                                                                    |                                                                            | £6,923 2010-11 prices        |                             |                       |                |
| BGDP Stages 1-3 minus control costs £s                                                                                                      |                                                                            | £3,988 2010-11 prices        |                             |                       |                |
| BGDP cost per school £s                                                                                                                     |                                                                            | £1,329 2010-11 prices        |                             |                       |                |
| BGDP cost per pupil £s                                                                                                                      |                                                                            | £44.31 2010-11 prices        |                             |                       |                |
| *Research team administration, travel and other costs are not included. Control costs in this research are included for information         |                                                                            |                              |                             |                       |                |
| Sources: 1. research team 2. project budget - all prices are actual rates paid. 3. Project budget - all costs are actual expenses incurred. |                                                                            |                              |                             |                       |                |

Table IV. Preference rankings of first choice leisure activities at each time point N (%)

| After-school leisure activity                                                                                         | Time 2  |         | Time 1  |         | Baseline Time 0 |         |
|-----------------------------------------------------------------------------------------------------------------------|---------|---------|---------|---------|-----------------|---------|
|                                                                                                                       | Ranking | N (%)   | Ranking | N (%)   | Ranking         | N (%)   |
| Go around with friends to shopping centres, streets, parks just for fun                                               | 1       | 46 (26) | 1       | 33 (25) | 2               | 12 (18) |
| Use the internet for fun: chats, YouTube, Facebook, Bebo, Myspace, looking for music (do not include school homework) | 2       | 31 (17) | 3       | 20 (15) | 3               | 8 (12)  |
| Take part in sports, athletics or physical activity                                                                   | 2       | 31 (17) | 2       | 22 (17) | 1               | 13 (20) |
| Play with or see friends at your home or their homes                                                                  | 3       | 21 (12) | 4       | 11 (9)  | 5               | 5 (7)   |
| Read books for enjoyment (do not include school books)                                                                | 4       | 13 (7)  | 5       | 10 (8)  | 4               | 6 (9)   |
| Go to discos or dance classes                                                                                         | 5       | 11 (6)  | 8       | 5 (4)   | 5               | 5 (7)   |
| Play a musical instrument, sing, draw, paint or write                                                                 | 6       | 9 (5)   | 4       | 11 (9)  | 3               | 8 (12)  |
| Send text messages or use Twitter on your mobile phone                                                                | 7       | 8 (5)   | 7       | 6 (5)   | 5               | 5 (7)   |
| Play computer games                                                                                                   | 8       | 4 (2)   | 6       | 8 (6)   | 6               | 4 (6)   |
| Watch TV DVDs or playbacks of programmes                                                                              | 8       | 4 (2)   | 9       | 4 (3)   | 7               | 2 (3)   |
| <b>Total of valid* responses/total responses</b>                                                                      |         | 178/210 |         | 130/210 |                 | 68/210  |

\*A valid response = each after-school leisure activity is ranked by a separate number between 1 and 10 by each individual participant using a PDA

Table V. Regression coefficients indicating the value of dance classes at t0 (week 0) and t1 (week 9) by group allocation

|                                                                          | Control time 0<br>(n=104/120*) |      |         | Control time 1<br>(n=104/120*) |      |         | Intervention time 0<br>(n=80/90*) |      |         | Intervention time 1<br>(n=80/90*) |      |         |
|--------------------------------------------------------------------------|--------------------------------|------|---------|--------------------------------|------|---------|-----------------------------------|------|---------|-----------------------------------|------|---------|
|                                                                          | Coeff                          | SE   | P value | Coeff                          | SE   | P value | Coeff                             | SE   | P value | Coeff                             | SE   | P value |
| <b>Frequency of dance class:</b>                                         |                                |      | <0.01   |                                |      | <0.01   |                                   |      | <0.01   |                                   |      | 0.04    |
| Twice a week                                                             | <b>0.18</b>                    | 0.07 |         | <b>0.30</b>                    | 0.07 |         | <b>0.25</b>                       | 0.58 |         | <b>0.13</b>                       | 0.06 |         |
| Three times a week                                                       | -0.18                          | 0.07 |         | -0.30                          | 0.07 |         | -0.25                             | 0.58 |         | -0.13                             | 0.06 |         |
| <b>Cost:</b>                                                             |                                |      | <0.01   |                                |      | <0.01   |                                   |      | <0.01   |                                   |      | <0.01   |
| £1                                                                       | <b>0.22</b>                    | 0.05 |         | -0.17                          | 0.04 |         | <b>0.46</b>                       | 0.07 |         | <b>0.26</b>                       | 0.06 |         |
| £2                                                                       | -0.22                          | 0.05 |         | <b>0.17</b>                    | 0.04 |         | -0.46                             | 0.07 |         | -0.26                             | 0.06 |         |
| <b>Other hours available for leisure activities on dance class days:</b> |                                |      | <0.01   |                                |      | <0.01   |                                   |      | <0.01   |                                   |      | <0.01   |
| 2 hours                                                                  | <b>0.35</b>                    | 0.06 |         | -0.31                          | 0.65 |         | <b>0.76</b>                       | 0.11 |         | <b>0.37</b>                       | 0.08 |         |
| 3 hours                                                                  | -0.35                          | 0.06 |         | <b>0.31</b>                    | 0.65 |         | -0.76                             | 0.11 |         | -0.37                             | 0.08 |         |

Preferred level of attribute in bold, attribute most concerned with shaded dark grey, attribute least concerned with shaded light grey \*Number of valid responses from total possible responses

## RESEARCH PILOT STUDY

### **Bristol Girls Dance Project feasibility study: using a pilot economic evaluation to inform design of a full trial**

Powell, J.<sup>1§</sup> Carroll, FE.<sup>2</sup> Sebire SJ.<sup>3</sup> Haase, AM.<sup>3</sup> Jago, R.<sup>3</sup>

<sup>1</sup> Professor of Public Health Economics, Department of Health and Applied Social Sciences, University of the West of England, Glenside Campus, Stapleton, Bristol, BS16 1DD, UK.

<sup>2</sup> Dr Fran E Carroll, Research Assistant, School of Social and Community Medicine, University of Bristol, BS8 2PS, UK.

<sup>3</sup> Dr Simon J Sebire, Post-Doctoral Researcher, Centre for Exercise Nutrition and Health Sciences, School for Policy Studies, University of Bristol, BS8 1TZ, UK.

<sup>3</sup> Dr Anne M Haase, Senior Lecturer in Exercise, Nutrition & Health, Centre for Exercise, Nutrition and Health Sciences, School for Policy Studies, University of Bristol, BS8 1TZ, UK.

<sup>3</sup> Professor Russell Jago, Professor of Paediatric Physical Activity & Public Health Exercise, Nutrition & Health Sciences, Centre for Exercise, Nutrition & Health Sciences, School for Policy Studies, University of Bristol, BS8 1TZ, UK.

<sup>§</sup> Corresponding author Professor Jane Powell, Department of Health and Applied Social Sciences, University of the West of England, Bristol, BS16 1DD, UK. 0044 117 3288752

## ABSTRACT

Wider context: There is currently little guidance for pilot trial economic evaluation where health outcomes and costs are influenced by a range of wider determinants and factors.

Objectives: This paper presents the findings of a pilot economic evaluation study running alongside the Bristol Girls Dance Project (BGDP) feasibility study ~~and describes how these have impacted the conduct and design of main trial economic evaluation.~~

Design: Three-arm, cluster randomised, controlled pilot trial and economic evaluation. Seven schools (n=210) from the Bristol and greater Bristol area, UK were randomly allocated to the intervention arm 3 schools (n= 90) and the control arms 4 schools (n=120).

Intervention: Girls aged 11-12 years with parental consent were provided with two, 90-minute dance sessions per week for 9-weeks at school facilities.

Economic outcome measures: Programme costs; and girls' preferences for attributes of dance and preferences for competing leisure time activities were measured. Primary outcome: ~~accelerometer derived moderate to vigorous physical activity (MVPA) minutes per day.~~

Results: ~~After school dance classes for girls aged 11-12 years are valued favourably in terms of other competing leisure choices compared with older adolescents. Discrete Choice Experiment (DCE) methods are acceptable to girls of this age.~~ The mainstream average cost of the BDGP programme (not including research, control and dance teacher training costs) per school ~~not including developmental and research costs at mainstream implementation~~ is was \$2,5552,126.40; £1,5961,329; €1,8701,555 and per participant \$85.1770.90; £53.2144.31; €62.3251.84 in 2010-11 prices. Discrete Choice Experiment (DCE) methods are acceptable to girls of this age indicating time available for other leisure activities on

1  
2  
3 dance class days is the attribute girls valued most and 2 hours leisure time remaining  
4  
5 preferred to 3 hours.  
6  
7

8  
9  
10  
11 Conclusions: This pilot study indicates ~~The feasibility of providing~~ full cost data for a  
12 ~~future~~ trial of the BGDG programme is feasible and practical. There is no evidence from  
13 preference data to support adjustment to intervention design. A future economic evaluation is  
14 likely to be successful utilising the resource use checklist developed. ~~has been established and~~  
15 ~~an embryonic resource use checklist developed for this purpose.~~ The importance of  
16 categorising separately ~~This pilot study has demonstrated~~ resources used to develop, prepare  
17 ~~and~~ deliver and maintain the programme ~~should be categorised separately, so the cost of the~~  
18 ~~mainstream programme can be to~~ estimated mainstream costs accurately is demonstrated in a  
19 full trial.  
20  
21  
22  
23  
24  
25  
26  
27  
28  
29  
30  
31

### 32 *Strengths and limitations of this study*

33  
34  
35 This pilot study used a systematic approach where there is currently minimal evidence to  
36 determine ~~consider how the conceptual and measurement process of an economic~~  
37 ~~evaluation~~ the costs of implementing a pilot dance intervention in girls 11-12 years old. might  
38 ~~be enhanced in a full trial by learning more about the cost and outcome dimensions of~~  
39 ~~economic evaluation and has~~ The study has produced findings about girls' preferences for  
40 dance and an embryonic costing tool that can be applied to design and conduct an economic  
41  
42  
43  
44  
45  
46  
47  
48  
49  
50  
51  
52  
53  
54  
55  
56  
57  
58  
59  
60

51 This feasibility and exploratory pilot study is powered to test the intervention concept, the  
52  
53  
54  
55  
56  
57  
58  
59  
60  
feasibility of obtaining programme cost data in categories and the evidence required to power

1  
2  
3 a full cluster RCT in the future. Consequently, the variation in programme costs at the school  
4  
5 level has not been captured and this is a limitation of the programme-cost estimates presented.

6  
7  
8 ~~A social model of costing that reflects opportunity costs of participants and parents could be~~  
9  
10 ~~considered.~~  
11  
12

## 13 14 15 16 **BACKGROUND**

17  
18  
19  
20 Recent influential studies attach substantial economic and social costs to obesity prevalence  
21  
22 projections.<sup>1 2</sup> These forecasts are based upon a body of research from long term cohort  
23  
24 studies which suggest that change in the prevalence of obesity in children and adolescents  
25  
26 born at the millennium is likely to lead to increased health risks in middle-age irrespective of  
27  
28 adult adiposity.<sup>3 4 5</sup> Consequently, there is a need for new interventions that focus on  
29  
30 preventing obesity or changing diet or physical activity; the two behaviours that are central to  
31  
32 the accrual of body mass.  
33  
34

35  
36 As well as being a health and wellbeing issue, children's obesity also has serious economic  
37  
38 impacts. Scarce resources with competing uses in all health systems and the need to decide  
39  
40 between new, 'efficacious' primary prevention physical activity programme interventions on  
41  
42 the grounds of cost-effectiveness, has increased the significance of economic evaluation as a  
43  
44 concept and methodology. Recent guidance from the UK Medical Research Council (MRC)  
45  
46 for the development and evaluation of complex behavioural interventions suggests that  
47  
48 efficacy and cost-effectiveness should be established before programmes are implemented at  
49  
50 the population level.<sup>6 7</sup> However, the meaningful determination of these criteria is often  
51  
52 problematic in primary prevention and guidelines for the design and conduct of economic  
53  
54 evaluation of complex interventions are at an early stage of development.<sup>8 9 10 11</sup> It is therefore  
55  
56  
57  
58  
59  
60

1  
2  
3 important to develop the conceptual and measurement process by which effectiveness and  
4  
5 cost-effectiveness of complex physical activity interventions can be evaluated in a full trial  
6  
7 using a pilot study.  
8  
9

10 The [main findings of the Bristol Girls Dance Project \(BGDP\) feasibility trial, concerning](#)  
11 [process evaluation, outcomes and effectiveness have been published elsewhere](#) ~~examined the~~  
12 ~~potential utility of an after-school dance programme as a means of increasing moderate to~~  
13 ~~vigorous physical activity (MVPA) among 11-12 year old girls (school year 7) seeking to~~  
14 ~~discover any improvements that might need to be made to the programme prior to a main~~  
15 ~~trial.~~<sup>12</sup> This [part of the study](#) suggested that it is feasible to deliver the intervention and that  
16  
17 participating in dance has the potential to yield change in [moderate to vigorous physical](#)  
18 [activity \(MVPA\) among 11-12 year old girls \(school year 7\)](#) ~~girls' physical activity~~, but a  
19  
20 larger randomised controlled trial (RCT) would be needed to fully evaluate its effectiveness  
21  
22 and cost-effectiveness.<sup>12</sup> In the absence of ~~other~~[robust](#) evidence for the [cost and](#) outcome of  
23  
24 dance interventions, ~~another aim~~s of the feasibility pilot ~~was~~[ere](#) to refine the information  
25  
26 required to sufficiently power a full trial [and to use the preference data to inform potential](#)  
27  
28 [refinements to intervention design](#).  
29  
30  
31  
32  
33  
34  
35  
36  
37  
38  
39

40 Preferences for competing after-school activities are potential determinants of the economic  
41  
42 benefit of dance intervention, as increased physical activity must be valued in order for it to  
43  
44 be maintained<sup>8</sup> and to have potential for long-term impact on physical activity levels. In this  
45  
46 study, [Discrete Choice Experiment \(DCE\)](#) and survey methods are applied to examine two  
47  
48 separate, but complementary aspects of value – preferences for the attributes of dance classes  
49  
50 and preferences for dance among other competing alternatives for spending leisure time  
51  
52 respectively. Physical activity levels decline during youth<sup>13</sup> with the start of secondary  
53  
54 school being a critical period of change, so it was important to establish comparative  
55  
56 preferences for after-school, leisure activities on weekdays.  
57  
58  
59  
60



1  
2  
3 Value is a concept germane to recruitment and retention rates and linked to the outcome  
4  
5 dimension of the BGDG intervention and therefore important to examine in detail. [Discrete](#)  
6  
7 [Choice Experiment \(DCE\)](#) works on the premise that any 'product', for example a healthcare  
8  
9 treatment or physical activity programme, can be described by its characteristics, or  
10  
11 attributes, and the extent to which an individual values a 'product' is dependent on the level  
12  
13 of these characteristics.<sup>14 15 16</sup>

14  
15  
16  
17 Thus, this paper reports the ~~learning from and~~ findings of a pilot economic evaluation of the  
18  
19 Bristol Girls Dance Project for girls aged 11-12 years in a primary school setting in England  
20  
21 ~~impact the that can be applied to~~ design and conduct of a [future](#) full trial [and](#) economic  
22  
23 evaluation. ~~Other findings from the Bristol Girls Dance Project Feasibility Trial concerning~~  
24  
25 ~~process evaluation, outcomes and effectiveness have been reported elsewhere.~~<sup>12</sup>  
26  
27  
28  
29  
30  
31

## 32 ARTICLE SUMMARY

### 33 *Article focus*

34  
35  
36  
37  
38 To examine [whether the feasibility of proposed methods for collection of resource use data](#)  
39  
40 [for estimating the costs are feasible, practical and likely to be successful in full trial economic](#)  
41  
42 [evaluation providing complete programme cost data from a funder perspective.](#)

43  
44  
45 [To understand preferences for after-school dance classes in the context of weekday leisure](#)  
46  
47 [time at age 11-12 years that can be applied to inform intervention design. To demonstrate the](#)  
48  
49 [appropriateness of using DCE and survey methods to derive participants' preferences for](#)  
50  
51 [dance among other competing leisure activities.](#)

52  
53  
54  
55 [To present learning from reflections on the findings of pilot economic evaluation to inform a](#)  
56  
57 [full trial economic evaluation](#)  
58  
59  
60

### *Key messages*

Time available for other leisure activities on dance class days is an attribute of after school dance classes girls aged 10-11 years valued most - followed by cost and frequency of dance classes per week.

2 hours available for other leisure activities on dance class days was preferred to 3 hours suggesting after-school dance classes are valued compared with other ways to spend leisure time after school on weekdays

Resources used in the development, preparation, delivery and maintenance of dance classes should be categorised separately in stages in order to identify the mainstream cost of the programme intervention to commissioners

A pilot economic evaluation has been applied to learn more about the feasibility of costing the BGDG complex intervention and categorising programme resources to identify the mainstream cost of the intervention during a full trial.

Pilot data from seven schools has been analysed to understand girls' preferences for dance versus other ways of spending their leisure time at age 11-12 years that can help to conceptualise and measure the outcome dimensions of economic evaluation alongside a full trial.

## **METHODS**

*Bristol Girls Dance Project (BGDP) feasibility study*

1  
2  
3 BGDG was a three-arm, parallel group, cluster randomised, controlled pilot trial with schools  
4 as the unit of allocation. Seven schools from three school districts, Bristol, Bath and South  
5 Gloucestershire (UK) were recruited to take part in the study from schools in these districts  
6  
7 with no current after school dance provision.<sup>12</sup> The hip-hop and street dance style of dance to  
8  
9 popular music was facilitated by a professional dance teacher.  
10  
11

12  
13  
14 Stratifying by school district, three schools were randomly allocated to the intervention arm  
15 (n= 90) and four schools to the two control arms (n=120) and each school was assigned a  
16 dance teacher to lead the sessions. Randomisation was conducted by an independent member  
17 of the clinical trials unit at Bristol University using computer-generated random sequences  
18 and codes for school district and school name. A full description of this has been detailed in  
19 another paper from this study.<sup>12</sup> The three intervention schools received two, 90-minute  
20 after-school dance classes per week for 9 weeks selected to allow the entire programme to be  
21 delivered within a school term. Pilot work had suggested that dance is a very attractive form  
22 of PA for girls, so the control element was designed to ascertain whether offering a dance  
23 workshop at the end of the research process (i.e., after the last data collection), would affect  
24 either retention or the quality of data provided by participants. We therefore utilized a three-  
25 arm design with two different control groups. In two schools, participants were provided with  
26 small thank you gifts for each wave of data collection. In the other two control schools  
27 participants were provided with the same small thank you gifts, as well as a half-day dance  
28 workshop at the end of the study.  
29  
30  
31  
32  
33  
34  
35  
36  
37  
38  
39  
40  
41  
42  
43  
44  
45  
46  
47  
48  
49  
50  
51  
52  
53

54 *Sample size*  
55  
56  
57  
58  
59  
60

1  
2  
3 This feasibility study was powered to test the intervention concept and to provide the  
4 necessary information to calculate the sample size of a full cluster RCT and economic  
5 evaluation of an after school dance programme. The important parameters detection of 10  
6 minutes difference in MVPA per weekday (50 minutes per week) between the intervention  
7 and control groups, intra-class correlation for weekday MVPA at time 2 and associated  
8 confidence intervals have been reported and profiled in another paper from this study.<sup>12</sup> For  
9 practical reasons the sample was limited to thirty girls aged 11-12 years per school. Girls  
10 were recruited from each school at random from those with parental consent.  
11  
12  
13  
14  
15  
16  
17  
18  
19

### 20 21 22 *The intervention*

23 ~~Intervention participants were provided with two, 90 minute dance sessions per week for 9-~~  
24 ~~weeks at school facilities. The hip hop and street dance style of dance to popular music was~~  
25 ~~facilitated by a professional dance teacher.~~  
26  
27  
28  
29  
30  
31  
32  
33  
34  
35

### 36 *Primary outcome measure*

37 ~~All participants were asked to wear an Actigraph accelerometer for seven days at baseline~~  
38 ~~(week 0) during the last two weeks of the intervention (weeks 8 or 9) and 3 months after the~~  
39 ~~intervention ended (Week 20).~~  
40  
41  
42  
43  
44  
45  
46  
47  
48  
49  
50  
51  
52  
53  
54  
55  
56  
57  
58  
59  
60

### *Economic measures*

#### *1) ~~Resource use cost~~*

~~Resources used at each stage of the BGDG programme were recorded retrospectively by the project team on time sheets and expense sheets from a public sector perspective. Costing followed a method applied in a study of complex intervention with children in a school setting (A Stop Smoking in Schools Trial) ASSIST.<sup>17</sup> Stage 0 intervention planning and development costs or costs associated with running the scientific study (e.g., control group incentives for data collection, control school dance workshops or recruitment events) would not recur during mainstream implementation, but these costs are included for completeness.~~

~~Expenses including entry incentives, postage and Criminal Records Bureau (CRB) checking were gathered. Travel time was estimated for all staff inputs at the school locations. Girls in the control schools received incremental thank you gifts at each data collection they attended. Space hire did not incur costs, but estimates of the cost of space hire for dance class delivery are included because costs connected with alternative use of space in schools. School overhead and capital costs are not included.~~

#### *2) ~~Discrete Choice Experiment (DCE) and survey of preference ranking and use of leisure time~~*

BGDG formative qualitative work indicated the frequency of after-school dance classes per week; cost per session and how much leisure time is left over on dance class days for other leisure activities are important considerations for girls in deciding whether to participate.<sup>187</sup> Participants were asked to select the 'dance class scenario' they preferred from a pair of

options. Table I presents the 4 paired scenarios (1A:1B, 2A:2B, 3A:3B, 4A:4B) consisting of a randomly determined combination of three attributes, each with two levels.

Table I

Four paired choice scenarios were administered to 210 girls in seven schools - 3 intervention schools (n=90) and 4 control schools (n=120). Measures were taken at baseline (time 0) and at 9 weeks (time 1) using large cards, and girls' preferred choice for each pair of scenarios was recorded by the project team. Two time points were needed to establish change in preferences before and after the intervention. Participants were also asked to give preference ratings for ten leisure activities on weekdays by survey using a ten-point scale (1 = favourite; 10 = least favourite). Participant responses were collected on Personal Digital Assistants (PDAs) and downloaded to a customised database.

## 2) Resource use-cost

At commencement of this pilot study there was minimal evidence on which to draw in identifying costs that might be included in a resource use checklist. One report from the National Institute for Health and Clinical Excellence (NICE) had modelled the cost of delivering dance classes to young children and produced some ball park cost estimates.<sup>18 19</sup> These were based on an account of the resources used in delivery of a dance programme for girls by Hampshire Dance and Laban<sup>20</sup> in which resources had been identified, but not costed. These uncontrolled studies provided a starting point and an opportunity to produce more complete and accurate costing data from the Bristol Girls Dance Project feasibility pilot trial in which the volume of resources used and prices could be treated separately. The cost items identified by NICE were entered into a database and data collected using time-sheets and expense sheets were collected by the project team. These cost estimates and some

1  
2  
3 estimates for teacher time to manage behaviour derived by the first author of this paper are  
4 detailed in Table II.<sup>18 19 20</sup> Table II was used as a template for identifying and costing  
5 resources in the BGDG feasibility study.  
6  
7  
8  
9

10  
11  
12 TABLE II here  
13  
14  
15  
16  
17

### 18 *Ethics*

19  
20 Potential participants in all seven schools were told that there was a maximum of 30  
21 randomly assigned spaces at the dance classes. The study was approved by a University of  
22 Bristol ethics committee and informed parental consent was obtained for all participants.  
23  
24  
25  
26  
27

### 28 *Analyses*

29  
30 Proportions of the sample ranking ten weekday leisure activities as first choice activity (rank  
31 = 1) were calculated after participants had rated all ten leisure activities from 1 to 10.  
32

33 Responses from participants with repetition of ratings for one or more leisure activities or  
34 missing ratings for leisure activities were excluded. Overall, where the proportion of the  
35 sample rating activities as their first choice was the same, these activities were assigned the  
36 same rank across all ten activities. ~~Valid responses as a proportion of total responses for the  
37 survey ranking leisure activities were t2=178/210, t1=130/210, t0=68/210 across all group  
38 allocations.~~  
39  
40  
41  
42  
43  
44  
45  
46  
47  
48  
49

50  
51 DCE data was 'effects-coded'<sup>1921</sup> using STATA<sup>220</sup> and analysed using conditional logistic  
52 regression. Effects coding is similar to dummy variable coding, but is preferable in this  
53 instance because interaction or trade-off between the attributes is likely to take place as well  
54  
55  
56  
57  
58  
59  
60

1  
2  
3 as a main effect. The coefficients for each attribute are a measure of the influence of that  
4  
5 attribute level on choice. Positive values represent a positive influence on choice, or in other  
6  
7 words, a preference for that level of an attribute. These results can be used to establish girls'  
8  
9 overall preferences for attributes, as well as the order of their preferences (i.e. which attribute  
10  
11 is most and least important). Participants with missing data were excluded from the DCE  
12  
13 analysis.  
14  
15

16  
17  
18 Total and average cost estimates from a funder perspective were identified and derived for  
19  
20 BGDG based on staged timing, quantity, frequency and price of resource use in 2010-11  
21

22 prices. Expenses including travel, intervention programme entry incentives, postage,  
23  
24 Criminal Records Bureau (CRB) applications were accessed from the database kept by the  
25  
26 project team. Girls in the control schools received small thank you gifts at each data  
27  
28 collection they attended. Space hire did not incur costs, but estimates of the cost of space  
29  
30 hire for dance class delivery are included because they are costs connected with alternative  
31  
32 use of space in schools. School overhead and capital costs are not included.  
33  
34  
35

36  
37  
38 Grouping costs to enable estimation of the mainstream cost adopted the categories used in (A  
39  
40 Stop Smoking in Schools Trial) ASSIST.<sup>23</sup> Stage 0 intervention planning, development and  
41  
42 training costs, stage 1 intervention preparation, stage 2 intervention delivery and stage 3  
43  
44 intervention maintenance costs were separately identified. Training costs for dance teachers  
45  
46 are identified separately. Costs associated with running the research study, control group  
47  
48 incentives for data collection, control school dance workshops and recruitment events) would  
49  
50 not recur during mainstream implementation, but these costs are included for clarity and  
51  
52 completeness. All costs connected with tasks undertaken by the research team are not  
53  
54 included.  
55  
56  
57  
58  
59  
60



## RESULTS

### *Identification and timing of resources used*

Table III identifies and describes at four stages the resources use of the BGDG programme and presents total cost estimates. The proportion of total costs incurred were 42% at stage 0, 57% at stage 1, 47% at stage 2 and 6% at stage 3. ~~BGDG required at least 286 hours of staff input.~~ At stage 0 half of the costs are dance teacher preparation and training time which arguably would be incurred in part in delivery of a mainstream form of the programme.

Eighteen BGDG dance classes (2 classes per week for 9 weeks) of 90 minutes duration were delivered to 90 girls in three intervention schools (30 per school) for 81 hours (27 hours per school) at a total estimated cost ~~of \$7,666; £4,789; €5,609~~ \$6,380, £3,988, €4,666 in 2010-11 prices.<sup>24+252</sup> ~~Removing stage 0 programme development and stage 1-3 research costs revealed an~~ The average cost of repeating at the BGDG programme in its mainstream form per school ~~of~~ was \$2,126.40; £1,329; €1,555 and per participant \$70.90; £44.31; €51.84 ~~\$2,555; £1,596; €1,870 and per participant of \$85.17; £53.21; €62.32~~ in 2010-11 prices. If training costs for dance teachers on the BGDG were included to the mainstream cost this would add \$1280; £800; €928 to the cost per school and \$43; £27; €31.60 to the cost per pupil. These are not insubstantial additions, but are at the high end of training costs because this new dance programme was properly prepared for delivery. Training costs for the delivery of an established dance programme are likely to be lower. It was not possible to calculate ~~There are no confidence intervals for these average programme costs~~ per school or per participant ~~participant estimates~~ (see limitations of this pilot study).

Table III here

~~The BGDG programme compares favourably in terms of average cost per user with the only other evidence for costing an after school dance class programme in England—estimated by Fordham and Barton<sup>23</sup> and included in NICE guidance<sup>24</sup> on the promotion of physical activity in children. These estimates<sup>23,24</sup> were based on a report of the NRG dance programme<sup>25</sup> which was delivered at a total cost of \$32,975; £20,600; €24,129 at 2010-11 prices. Assumptions were made<sup>23</sup> to derive costs for NICE guidance from the NRG report.<sup>25</sup>~~

The shorter and less intensive NRG programme costed in the NICE report<sup>19</sup> comprised 10 dance classes of 60 minutes duration for ~~an assumed number of~~ 24 girls (an assumed number) in 14 groups or schools (n=336 girls) for 140 hours with a cost per participant of \$98.14; £61.31; €71.81, in 2010-11 prices. This includes 140 hours of teacher time sourced from national pay scales for England at £23.57 per hour at 2010-11 prices.<sup>26</sup>

### *Preferences for leisure activities*

All girls were asked to rank ten after-school leisure activities by first preference activity.

Valid responses as a proportion of total responses for the survey ranking leisure activities were t2=178/210, t1=130/210, t0=68/210 across all group allocations.

Table III presents proportions across the participants (n=210) for preference ranks for after-school leisure activities for all group allocations at each time point demonstrating consistency in preference ranks indicating girls' selection of first choice leisure activities at each time point. The after-school leisure activities indicating the highest proportion of first choice preference rankings at each time point include 'hanging out with friends away from home just for fun' (Ranking at t2=1, t1=1, t0=2); 'take part in sports, athletics or physical activity' (Ranking at t2=2, t1=2, t0=1) and 'using the internet for fun: chats, YouTube, Facebook, Bebo, Myspace, looking for music' (Ranking at t0=3, t1=3, t2=2). -Valid responses were

1  
2  
3 included in the analyses. Valid responses as a proportion of total responses for the survey  
4  
5 ranking leisure activities were  $t_2=178/210$ ,  $t_1=130/210$ ,  $t_0=68/210$  across all group  
6  
7 allocations indicating particularly at baseline the participants experienced some problems  
8  
9 using a hand held PDA to rank and rate the weekday after-school leisure activities.

10  
11  
12  
13 Table ~~III~~IV here  
14  
15  
16  
17  
18  
19

### 20 *DCE results*

21  
22 The p values for the regression coefficients in Table IV indicates girls in this sample have a  
23 preference for “time left for other leisure activities on dance class days”, over the “cost of”  
24 and “frequency of dance classes per week”. Analysis of preference levels within each  
25 attribute suggests 2 hours is preferred to 3 hours remaining for other leisure activities on  
26 dance class days. This pattern was consistent in all intervention and control groups at t0 and  
27 t1. Girls were least concerned with the frequency of dance classes per week with preference  
28 proportions suggesting 2 classes were preferred to 1 dance class per week in both intervention  
29 groups and the baseline control group. ~~This pattern was consistent in all groups at t0 and t1.~~  
30  
31  
32  
33  
34  
35  
36  
37  
38  
39  
40  
41

42 Table ~~IV~~ here  
43  
44  
45  
46  
47  
48

## 49 **DISCUSSION**

### 50 *What is already known on this topic*

51  
52  
53  
54 There is minimal guidance to support how economic evaluations of complex public health  
55 interventions should be designed and conducted in school and community settings.  
56  
57  
58  
59  
60

1  
2  
3 There are no checklists or tools available to support costing dance programmes and minimal  
4  
5 knowledge of how to categorise resources to identify the mainstream cost of delivery.  
6  
7

8 Discrete Choice Experiment (DCE) methods to elicit the relative preferences and choices of  
9  
10 girls aged 11-12 years are untried and untested, but it is important to capture how girls value  
11  
12 dance among other competing leisure activities using a robust and acceptable method.  
13  
14

15  
16  
17  
18  
19  
20 *What this study adds*  
21

22 Providing programme cost data for a full trial of the BGDG programme is feasible, practical  
23  
24 and likely to be successful. Around two-~~ffth~~thirds of resources are development and  
25  
26 research control costs, so resources used to develop, prepare and deliver these programmes  
27  
28 should be categorised separately, so the cost of the mainstream programme can be estimated  
29  
30 accurately in a full trial.  
31  
32

33  
34 Discrete Choice Experiment is an acceptable method to elicit preferences of girls aged 11-12  
35  
36 years.  
37  
38

39 At this point in their lives after-school dance is an activity valued by popular choice girls  
40  
41 when offered within the context of other competing choices and parental support for activities  
42  
43 for spending leisure time after school on weekdays. ~~predicts positive recruitment and~~  
44  
45 ~~retention rates in after school dance activities.~~  
46  
47

48  
49 Participation in after-school dance classes has opportunity costs for participants and parents  
50  
51 extending beyond the funder that suggest a social model of cost should be considered for a  
52  
53 full trial to capture the costs associated with intervention outcome.  
54  
55  
56  
57  
58  
59  
60

1  
2  
3 Robust evidence for the cost-effectiveness of physical activity complex interventions is  
4 important for knowing where to invest scarce resources and commission programmes to  
5 maximise health outcomes in primary prevention.<sup>27 28 29</sup> However, gathering robust evidence  
6 to support investment in public health interventions is a challenge.<sup>30 31</sup> Significant barriers  
7 remain and there is currently little guidance in how to conduct economic evaluation where  
8 behaviour change is associated with health outcomes determined beyond genetic inheritance  
9 by family, social and physical environments.<sup>32 33</sup>

10  
11  
12 Indicative programme cost data from the pilot economic evaluation indicated a substantial  
13 proportion of the intervention programme costs 42% occur at Stage 0 – the pre-programme  
14 ~~planning and~~ development stage. This is an important finding because it suggests provided  
15 BGDG is effective and cost-effective in a full trial, it would be substantially less costly to roll  
16 out in its mainstream form. All complex interventions in primary prevention are likely to  
17 generate a high proportion of upfront development costs that will not reoccur once a  
18 programme is mainstreamed – an aspect of investment in public health interventions often  
19 overlooked by decision makers.

20  
21  
22 Application of DCE is an established technique in adult populations, but to our knowledge  
23 has not been applied previously in populations of children aged 11-12 years to establish  
24 values for the attributes of physical activities. This study has demonstrated application of  
25 DCE methods is feasible and acceptable to girls of this age. This is important because it  
26 suggests DCE could be applied in other studies with children to understand the concept of  
27 ‘value’ of an activity which plays an important role in recruitment, participation and  
28 maintenance of participants which are all linked to intervention outcome. In addition to its  
29 acceptability in this study the DCE method has produced more complete and valid data than  
30 the direct survey method in eliciting preference ranks for after-school leisure activities. These

1  
2  
3 findings support a previous contention that DCE techniques may have merit over more  
4 'traditional' survey methods<sup>34</sup> in eliciting preferences. However, more evidence would be  
5  
6  
7 required to fully support this finding.  
8  
9

10 Taken together, findings of the DCE and survey of leisure activity preference in this study  
11 indicate dance is a valued leisure activity among competing alternatives and reveals more  
12 about the attributes of dance classes in girls of this age that can be taken forward to maximise  
13 recruitment and retention in the BGDG programme. The findings of this study suggest that  
14 dance has immediate appeal as an after-school leisure activity among a range of strongly  
15 competing alternatives in girls of this age compared with older adolescents.<sup>35</sup> Girls in this  
16 study have a first rank preference for the attribute 'time remaining for other leisure activities  
17 on dance class days', over the 'cost of' and 'frequency of dance classes per week'. The  
18 finding that in the intervention group two hours is preferred to three hours remaining for  
19 other leisure activities on dance class days is significant. Overall these findings could suggest  
20 that at this point in their lives dance is ~~popular choice in~~ valued by girls as a physical and  
21 social activity of this age when offered within the context of ~~other~~ competing and constrained  
22 choices for spending leisure time at this age. For example, at this age girls are not likely to be  
23 able to go to 'discos or dance classes' without parents or carers or to 'hang around on street  
24 corners with friends' and these issues may have affected their responses in the survey. These  
25 are important findings because they predict positive recruitment rates and participation of  
26 girls aged 11-12 years in dance as a physical leisure time activity and in a full trial.<sup>36</sup>  
27  
28  
29  
30  
31  
32  
33  
34  
35  
36  
37  
38  
39  
40  
41  
42  
43  
44  
45  
46  
47  
48

49 Delivery of after-school dance classes is dependent upon substantial commitment from the  
50 girls giving up their after-school leisure time to participate in dancing. In turn, participation  
51 is dependent upon the willingness of parents and carers to support attendance and to provide  
52 encouragement and a means of travelling back home after school hours when school buses  
53 are not available. This pilot study suggests development of a social model of costing that  
54  
55  
56  
57  
58  
59  
60

1  
2  
3 reflects the cost of participants' and parents' time and opportunity costs are substantial  
4  
5 elements of the intervention cost that could be captured, if practical, in a full trial.  
6  
7

8 However, methods and tools to capture 'hidden' cost items that facilitate the success of the  
9  
10 intervention, but are not incurred by funders are not yet fully established. <sup>4723</sup> Where to  
11 include training costs in these metrics is a question that remains for a future trial as they  
12 should arguably be included in mainstream cost estimation despite their categorisation as  
13 development costs. How identification of costs falling outside the public sector that are  
14  
15 relevant to programme implementation can be captured at a full trial stage also needs to be  
16  
17 considered carefully.<sup>37</sup> In a full trial resources used should be captured prospectively<sup>38</sup> and  
18  
19 this pilot study has established categories of resource use are also important to consider to  
20  
21 establish accurate mainstream programme costs.  
22  
23  
24  
25  
26  
27

## 28 29 **CONCLUSIONS**

30  
31 The feasibility of providing costing data for full trial of the BGDG programme in is  
32  
33 established and an embryonic resource use checklist has been developed. Resources used to  
34  
35 develop and run the BGDG programme should be categorised separately in order for the  
36  
37 mainstream delivery cost of BGDG to be estimated accurately in a full trial. A social model of  
38  
39 costing that reflects participants and parents opportunity costs should be considered. BGDG  
40  
41 after-school dance classes have potential for sustained participation and cost-effective  
42  
43 delivery, but a full trial using methodological learning from this study is required.  
44  
45  
46  
47  
48

## 49 **Competing interests**

50  
51 There are no competing interests.  
52  
53  
54  
55  
56  
57  
58  
59  
60

### Authors' Contributions

The quantitative analysis plan was conceived by JP, FC, RJ and SJS. Analyses were performed by JP and FC and interpretation by JP, FC, RJ, SJS and AMH. JP drafted the first version of the manuscript with additional sections provided by FC. All authors provided critical edits and revisions to the paper and have reviewed and approved the final version of the paper.

**Data sharing statement** No additional data are available

### Funding

This research was funded by the National Prevention Research Initiative (<http://npri.org.uk>), consisting of the following funding partners: Alzheimer's Research Trust; Alzheimer's Society; Biotechnology and Biological Sciences Research Council, British Heart Foundation; Cancer Research UK; Chief Scientist Office; Scottish Government Health Directorate; Department of Health; Diabetes UK; Economic and Social Research Council; Engineering and Physical Sciences Research Council; Health & Social Care Research & Development Office for Northern Ireland; Medical Research Council; The Stroke Association; Welsh Assembly Government and World Cancer Research Fund [grant number G090084].

### Acknowledgments

We would like to thank all the participants, dance teachers, school teachers and schools who participated in or assisted with this research. Professor Powell acknowledges discussion of and feedback from a draft version of this paper presented at the Health Economists Bristol (HEB) journal club <http://www.bris.ac.uk/social-community-medicine/centres/healthecon> in



1  
2  
3 November 2011. Laura Davis project manager BGDG and Jade McNeil research associate are  
4  
5 acknowledged for data collection leading to this paper. Fran Carroll's contemporaneous PhD  
6  
7 research was supervised by Dr Alan A Montgomery at the time of DCE design and data  
8  
9 analysis. Dr Jago is supported by a National Institute for Health Research career development  
10  
11 fellowship. This work was also supported by DECIPHER, a UKCRC Public Health Research:  
12  
13 Centre of Excellence. Funding from the specific funders under the auspices of the UK  
14  
15 Clinical Research Collaboration is gratefully acknowledged. The other co-applicants of the  
16  
17 main BGDG study, Professor Ashley R Cooper and Dr Alan A Montgomery are  
18  
19 acknowledged. The views expressed in this publication are those of the authors and not  
20  
21 necessarily those of the NHS, the National Institute for Health Research or the Department of  
22  
23 Health.  
24  
25  
26  
27  
28  
29  
30  
31  
32  
33  
34  
35  
36  
37  
38  
39  
40  
41  
42  
43  
44  
45  
46  
47  
48  
49  
50  
51  
52  
53  
54  
55  
56  
57  
58  
59  
60

1  
2  
3  
4  
5  
6  
7  
8  
9  
10  
11  
12  
13  
14  
15  
16  
17  
18  
19  
20  
21  
22  
23  
24  
25  
26  
27  
28  
29  
30  
31  
32  
33  
34  
35  
36  
37  
38  
39  
40  
41  
42  
43  
44  
45  
46  
47  
48  
49  
50  
51  
52  
53  
54  
55  
56  
57  
58  
59  
60

For peer review only

1  
2  
3  
4  
5  
6  
7  
8  
9  
10  
11  
12  
13  
14  
15  
16  
17  
18  
19  
20  
21  
22  
23  
24  
25  
26  
27  
28  
29  
30  
31  
32  
33  
34  
35  
36  
37  
38  
39  
40  
41  
42  
43  
44  
45  
46  
47  
48  
49  
50  
51  
52  
53  
54  
55  
56  
57  
58  
59  
60

---

## References

1. Foresight. *Tackling obesity: future choices*. London: Government Office for Science, 2007.
2. Stamatakis E, Zaninotto P, Falaschetti E, Mindell, J. Head J. Time trends in childhood and adolescent obesity in England from 1995 to 2007 and projections of prevalence to 2015. *J Epidemiol Community Health* 2010; **64**:167-174.
3. Gunnell D, Frankel S, Nanchahal K, et al Childhood obesity and adult cardiovascular mortality: a 57 year follow-up study based on the Boyd Orr cohort. *Am J Clin Nutr* 1998; **67**:1111-18.
4. Must A, Jacques PF, Dallal GE, et al. Long term morbidity and mortality of overweight adolescents – a follow-up of the Havard growth study of 1922 to 1935. *N Engl J Med* 1992; **327**:1350-5.

- 1  
2  
3 5. Engeland A, Bjorge T, Sogaard AJ, et al. Body mass index in adolescence in relation  
4  
5 to total mortality: 32-year Follow-up of 227,000 Norwegian boys and girls. *Am J*  
6  
7 *Epidemiol* 2003;157:517-23.  
8  
9
- 10  
11  
12 6. Lancaster GA, Dodd S, Williamson P. Design and analysis of pilot studies:  
13  
14 recommendations for good practice. *J Eval Clin Pract* 2004, 10, 2:307-312.  
15  
16  
17
- 18  
19 7. Craig P, Dieppe P, Macintyre S, Michie S, Nazareth I, Petticrew M. Developing and  
20  
21 evaluating complex interventions: the new Medical Research Council guidance. *BMJ*  
22  
23 2008, 337:a1655.  
24  
25  
26
- 27  
28 8. Wolfenstetter SB. Conceptual framework for standard economic evaluation of  
29  
30 physical activity programmes in primary prevention. *Prev Sci.*2011; 12(4):435-51.  
31  
32  
33
- 34  
35 9. Sheill, A. Hawe, P. Gold, L. Complex interventions or complex systems? Implications  
36  
37 for health economic evaluation. *BMJ*, 2008; 336:1281-1283.  
38  
39
- 40  
41 10. Weatherly H, Drummond M, Claxton K, et al. *Assessing the challenges of applying*  
42  
43 *standard methods of economic evaluation to public health interventions*. York: Centre  
44  
45 for Health Economics, 2009.  
46  
47
- 48  
49 11. Anderson R. Systematic reviews of economic evaluations: utility or futility. *Health*  
50  
51 *Econ*, 2010;19:350-364.  
52
- 53  
54 12. Jago R, Sebire S, Cooper AR, et al. Bristol Girls Dance Project Feasibility Trial:  
55  
56 Outcome and process evaluation results. *Int J Behav Nutr Phys Act*, 2012; 9, 83.  
57  
58  
59  
60

- 1  
2  
3 13. Gorely T, Marshall S, Biddle SJH, Cameron N. The prevalence of leisure time  
4  
5 sedentary behaviour and physical activity in adolescent girls: An ecological  
6  
7 momentary assessment approach. *Int J Pediatr Obes*, 2007; 2:227-234.  
8  
9  
10  
11  
12 14. Cheraghi-Sohi S, Bower P, Mead N, McDonald R, Whalley D, Roland M. Making  
13  
14 sense of patient priorities: applying discrete choice methods in primary care using  
15  
16 'think aloud' technique. *Fam Pract*, 2007; 24: 276-282.  
17  
18  
19 15. Green C, Gerard K. Exploring the social value of health-care interventions: a stated  
20  
21 preference discrete choice experiment. *Health Econ*, 2009; 18:951-976.  
22  
23  
24  
25 16. Petrou S, McIntosh E. (2009) Women's Preferences for Attributes of First-Trimester  
26  
27 Miscarriage Management: A Stated Preference Discrete-Choice Experiment. *Value*  
28  
29 *Health*, 12,4:551-559.  
30  
31  
32  
33 ~~17. Hollingworth W, Cohen D, Hawkins J, et al. Reducing smoking in adolescents: cost-~~  
34  
35 ~~effectiveness results from the cluster randomised ASSIST (A Stop Smoking in~~  
36  
37 ~~Schools Trial). *Nicotine & Tob Res*, 2011; 14, 2:161-168.~~  
38  
39  
40  
41  
42 ~~18-17.~~ Jago, R. Davis, L. McNeil, J. et al. Adolescent girls' and parents' views on  
43  
44 recruiting and retaining girls into an after-school dance intervention: implications for  
45  
46 extra-curricular physical activity provision. *Int J Behav Nutr Phys Act*, 2011, 8, 91.  
47  
48  
49  
50  
51 ~~19-18.~~ Fordham R, Barton GP. *Promotion of physical activity in children programme*  
52  
53 *guidance: a cost-effectiveness scenario analysis. London:NICE, 2008.*  
54  
55  
56  
57  
58  
59  
60

- 1  
2  
3  
4  
5  
6  
7  
8  
9  
10  
11  
12  
13  
14  
15  
16  
17  
18  
19  
20  
21  
22  
23  
24  
25  
26  
27  
28  
29  
30  
31  
32  
33  
34  
35  
36  
37  
38  
39  
40  
41  
42  
43  
44  
45  
46  
47  
48  
49  
50  
51  
52  
53  
54  
55  
56  
57  
58  
59  
60
- ~~20-19.~~ [NICE public health guidance 17. Promoting physical activity, active play and sport for pre-school and school-age children and young people in family, pre-school, school and community settings. NICE:London, 2009.](#)
- ~~21-20.~~ [Hampshire Dance and Laban \(2007\)\[online\] Accessed on December 7<sup>th</sup> 2012. NRG Youth Dance and Health Report 2005-6.](#)  
<http://www.hampshiredance.org.uk/documents/NRGEvaluationReport.pdf>
- ~~22-21.~~ Bech,M. Gyrd-Hansen,D.. Effects coding in discrete choice experiments. *Health Econ*, 2005; 14,10.
- ~~23-22.~~ STATA CORP LP (2009) *STATA user's guide release 11*. Texas, USA: STATA CORP LP.
- ~~23.~~ [Hollingworth W, Cohen D, Hawkins J, et al. Reducing smoking in adolescents: cost-effectiveness results from the cluster randomised ASSIST \(A Stop Smoking in Schools Trial\). \*Nicotine & Tob Res\*, 2011; 14, 2:161-168.](#)
24. Safalra [online] 2012. *Historical UK Inflation and price conversion rates*. Accessed on May 3<sup>rd</sup> 2012 at:- <http://safalra.com/other/historical-uk-inflation-price-conversion/>.
25. Oanda [online] 2012. *Historical exchange rates*. Accessed on May 3<sup>rd</sup> 2012 at:- <http://www.oanda.com/currency/historical-rates/>.
- ~~26.~~ [Fordham R, Barton GP. Promotion of physical activity in children programme guidance: a cost effectiveness scenario analysis. London:NICE, 2008.](#)
- ~~27.~~ [NICE public health guidance 17. Promoting physical activity, active play and sport for pre-school and school-age children and young people in family, pre-school, school and community settings. NICE:London, 2009.](#)

~~28. Hampshire Dance and Laban (2007)[online] Accessed on December 7<sup>th</sup> 2012. NRG  
Youth Dance and Health Report 2005-6.~~

~~<http://www.hampshiredance.org.uk/documents/NRGEvaluationReport.pdf>~~

29-26. \_\_\_\_ TES [online] 2011 *Teacher's pay scales from September 2011 unchanged from 2010*. <http://www.tes.co.uk/article.aspx?storycode=6000186>

30-27. \_\_\_\_ Rush B, Sheill A, Hawe P. A census of economic evaluations in health promotion. *Health Educ Res*, 2004; 19:707-719.

31-28. \_\_\_\_ Kelly MP, McDaid D, Ludbrook A, Powell JE. *Economic appraisal of public health interventions*. London:Health Development Agency, 2005.

32-29. \_\_\_\_ Anderson R. New MRC guidance on evaluating complex interventions. *BMJ*, 2008;337:944-5.

33-30. \_\_\_\_ Buchanan J, Wolstenholme J, Foster C. *A rapid review of economic literature related to the promotion of physical activity, play and sport for pre-school and school-age children in family, pre-school, school and community settings*. London:NICE, 2008.

34-31. \_\_\_\_ Richardson AK. Investing in public health: barriers and possible solutions. *J Public Health* 2012; 34:322-7.

35-32. \_\_\_\_ Ogilvie D, Bull F, Powell J, et al. An applied ecological framework for evaluating infrastructure to promote walking and cycling: the iConnect study. *Am J Public Health*. 2011;101:473-481.

1  
2  
3  
4  
5 | 36-33. Powell J. Compression of morbidity outcomes key to investment in public  
6 health. *J Public Health* 2012; 34:329.  
7  
8  
9

10  
11 | 37-34. Alvarez-Farizo B, Hanley N, Barberan R. The value of leisure time: a  
12 contingent rating approach, *J Environ Plan Man*, 2001; 44(5):681-699.  
13  
14  
15

16  
17 | 38-35. O'Neill, J. Pate, R. Hooker, SP. The contribution of dance to daily physical  
18 activity among adolescent girls. *Int J Behav Nutr Phys Act*, 2011; 8:87.  
19  
20  
21

22  
23 | 39-36. Nader PR, Bradley RH, Houts RM, McRitchie SL, O'Brien M: Moderate-to-  
24 vigorous physical activity from ages 9 to 15 years. *JAMA* 2008, 300:295-305.  
25  
26  
27

28  
29 | 40-37. Alvarez-Farizo B, Hanley N, Barberan R. The value of leisure time: a  
30 contingent rating approach, *J Environ Plan Man*, 2001; 44,5:681-699.  
31  
32  
33

34  
35 | 41-38. Ridyard C, Hughes D. Methods for the collection of resource use data within  
36 clinical trials: a systematic review of the studies funded by the UK Health Technology  
37 Assessment Programme. *Value Health*, 2010; 13, 8:867-872.  
38  
39  
40  
41  
42  
43  
44  
45  
46  
47  
48  
49  
50  
51  
52  
53  
54  
55  
56  
57  
58  
59  
60



## TABLES

**Table 1. Attributes and levels of the Discrete Choice Experiment and the four choice sets given to participants**

| Level of attributes                                                                                                                            | Attributes                          |                                                                                                                                                 |                                                                                  |
|------------------------------------------------------------------------------------------------------------------------------------------------|-------------------------------------|-------------------------------------------------------------------------------------------------------------------------------------------------|----------------------------------------------------------------------------------|
|                                                                                                                                                | Frequency of dance classes per week | Cost per session                                                                                                                                | Hours left for other leisure activities on that day                              |
| <b>Upper</b>                                                                                                                                   | 2 dance classes per week            | £1 per session                                                                                                                                  | Leaving 3 hours for other leisure activities on the evening of the dance session |
| <b>Lower</b>                                                                                                                                   | 1 dance class per week              | 50p per session                                                                                                                                 | Leaving 2 hours for other leisure activities on the evening of the dance session |
| 1A ←                                                                                                                                           |                                     | → 1B                                                                                                                                            |                                                                                  |
| You take one after school dance class each week at a cost of £1 per class leaving you 3 hours on that evening for other leisure activities     |                                     | You take two after school dance classes each week at a cost of 50p per class leaving you 2 hours on those evenings for other leisure activities |                                                                                  |
| 2A ←                                                                                                                                           |                                     | → 2B                                                                                                                                            |                                                                                  |
| You take two after school dance classes each week at a cost of £1 per class leaving you 2 hours on those evenings for other leisure activities |                                     | You take one after school dance class each week at a cost of 50p per class leaving you 3 hours on that evening for other leisure activities     |                                                                                  |
| 3A ←                                                                                                                                           |                                     | → 3B                                                                                                                                            |                                                                                  |
| You take one after school dance class each week at a cost of 50p per class leaving you 2 hours on that evening for other leisure activities    |                                     | You take two after school dance classes each week at a cost of £1 per class leaving you 3 hours on those evenings for other leisure activities  |                                                                                  |
| 4A ←                                                                                                                                           |                                     | → 4B                                                                                                                                            |                                                                                  |
| You take two after school dance classes each week at a cost of 50p per class leaving you 3 hours on                                            |                                     | You take one after school dance class each week at a cost of £1 per class leaving you 2 hours on that                                           |                                                                                  |

|                                             |                                      |
|---------------------------------------------|--------------------------------------|
| those evenings for other leisure activities | evening for other leisure activities |
|---------------------------------------------|--------------------------------------|

For peer review only

1  
2  
3  
4  
5  
6  
7  
8  
9  
10  
11  
12  
13  
14  
15  
16  
17  
18  
19  
20  
21  
22  
23  
24  
25  
26  
27  
28  
29  
30  
31  
32  
33  
34  
35  
36  
37  
38  
39  
40  
41  
42  
43  
44  
45  
46  
47  
48  
49  
50  
51  
52  
53  
54  
55  
56  
57  
58  
59  
60

**Table II. Resources use identification template used to inform BGDG feasibility study**

| <u>NRG Youth Dance &amp; Health Project<sup>1</sup></u>                                                                                                                                                                                                                                                                                                                                                                                                                                                                     |                                 |
|-----------------------------------------------------------------------------------------------------------------------------------------------------------------------------------------------------------------------------------------------------------------------------------------------------------------------------------------------------------------------------------------------------------------------------------------------------------------------------------------------------------------------------|---------------------------------|
|                                                                                                                                                                                                                                                                                                                                                                                                                                                                                                                             | <u><sup>2</sup>Total Cost £</u> |
| <u>Project planning work: initial research into existing action research projects</u>                                                                                                                                                                                                                                                                                                                                                                                                                                       | <u>500.00</u>                   |
| <u>Lead artist fee -programme design/artist training</u>                                                                                                                                                                                                                                                                                                                                                                                                                                                                    | <u>800.00</u>                   |
| <u>Artists' travel fees – attending training/planning sessions</u>                                                                                                                                                                                                                                                                                                                                                                                                                                                          | <u>637.35</u>                   |
| <u>Artists' fee</u>                                                                                                                                                                                                                                                                                                                                                                                                                                                                                                         | <u>5,806.00</u>                 |
| <u>Artists' travel costs</u>                                                                                                                                                                                                                                                                                                                                                                                                                                                                                                | <u>1,515.44</u>                 |
| <u>Coach hire – school group for pilot session</u>                                                                                                                                                                                                                                                                                                                                                                                                                                                                          | <u>562.88</u>                   |
| <u>Space hire</u>                                                                                                                                                                                                                                                                                                                                                                                                                                                                                                           | <u>254.70</u>                   |
| <u>Disclosures/refreshments</u>                                                                                                                                                                                                                                                                                                                                                                                                                                                                                             | <u>77.98</u>                    |
| <u>Postage</u>                                                                                                                                                                                                                                                                                                                                                                                                                                                                                                              | <u>64.03</u>                    |
| <u>Management fee</u>                                                                                                                                                                                                                                                                                                                                                                                                                                                                                                       | <u>4,000.00</u>                 |
| <u>Staff travel</u>                                                                                                                                                                                                                                                                                                                                                                                                                                                                                                         | <u>443.65</u>                   |
| <u>Documentation (dissemination advocacy)</u>                                                                                                                                                                                                                                                                                                                                                                                                                                                                               | <u>269.70</u>                   |
| <u>Road-show event – end of project</u>                                                                                                                                                                                                                                                                                                                                                                                                                                                                                     | <u>562.88</u>                   |
| <u>Additional schools workshop</u>                                                                                                                                                                                                                                                                                                                                                                                                                                                                                          | <u>151.80</u>                   |
| <u>Total 2005-6 prices £</u>                                                                                                                                                                                                                                                                                                                                                                                                                                                                                                | <u>15,203.53</u>                |
| <u>Teacher time for behaviour management (not included in NRG report)<sup>3</sup></u>                                                                                                                                                                                                                                                                                                                                                                                                                                       | <u>3,300.00</u>                 |
| <u>Total 2007-8 prices £ with teacher management</u>                                                                                                                                                                                                                                                                                                                                                                                                                                                                        | <u>19,427.76</u>                |
| <u>Total 2010-11 prices £</u>                                                                                                                                                                                                                                                                                                                                                                                                                                                                                               | <u>20,600.00</u>                |
| <sup>1</sup> resource use items identified by <a href="#">Hampshire Dance and Laban, NRG Youth Dance and Health Project Evaluation report<sup>20</sup></a><br><sup>2</sup> <a href="#">assumptions and costing profile</a> produced by <a href="#">Fordham &amp; Barton (2008)<sup>18</sup></a> for <a href="#">NICE Guidance 17 (NICE,2009)<sup>19</sup></a><br><sup>3</sup> This item was identified in the <a href="#">NICE report<sup>20</sup></a> but not <a href="#">included in the NICE costing<sup>18 19</sup></a> |                                 |

Table III. Description of resources used, unit volumes, and prices and estimated costs\* by category by school by pupil in 2010-11 prices

| Stage of BGDG                                                                                                                               | Description of resources used                                              | Number of units <sup>1</sup> | Price per unit <sup>2</sup> | Cost £ 2010-11 prices | Cost stage     |
|---------------------------------------------------------------------------------------------------------------------------------------------|----------------------------------------------------------------------------|------------------------------|-----------------------------|-----------------------|----------------|
| Pre-Programme planning development stage 0                                                                                                  | Lead dance artist consultation and development work                        | 2 days                       | £500 per day                | 1000                  | <u>4726</u>    |
|                                                                                                                                             | Lead dance artist time, to adapt training programme for hip hop genre      | 1 day                        | £500 per day                | 500                   |                |
|                                                                                                                                             | Lead dance artist time, to prepare dance teachers for 9 week intervention  | 1 day                        | £500 per day                | 500                   |                |
|                                                                                                                                             | 3 dance teachers preparation/training time                                 | 7.5 days                     | £27 per hour                | 2400                  |                |
|                                                                                                                                             | Travel expenses                                                            |                              |                             | 288 <sup>3</sup>      |                |
|                                                                                                                                             | Disclosures CRB forms                                                      |                              |                             | 38 <sup>3</sup>       |                |
| Programme preparation stage 1                                                                                                               | Space hire for dance taster sessions in intervention schools               | 6 hours                      | £15 per hour                | 90                    | <u>819</u>     |
|                                                                                                                                             | Dance teacher delivery of taster sessions in intervention schools          | 6 hours                      | £27 per hour                | 162                   |                |
|                                                                                                                                             | Control schools (n=4) recruitment presentations                            | 1 day                        | 500 per day                 | 500                   |                |
|                                                                                                                                             | Postage costs                                                              |                              |                             | 25 <sup>3</sup>       |                |
|                                                                                                                                             | Travel expenses                                                            |                              |                             | 42 <sup>3</sup>       |                |
| Programme delivery stage 2                                                                                                                  | Delivery 18 dance classes at 90 minutes per class over 9 weeks x 3 schools | 81 hours                     | £27 per hour                | 2187                  | <u>5375</u>    |
|                                                                                                                                             | T-shirts for 3 intervention schools                                        | 90 girls                     | £5 per T-shirt              | 450                   |                |
|                                                                                                                                             | Small gift incentives for control schools data collection                  | 3 waves                      | £731 per wave               | 2192                  |                |
|                                                                                                                                             | Refreshments                                                               |                              |                             | 100 <sup>3</sup>      |                |
|                                                                                                                                             | Travel expenses                                                            |                              |                             | 446 <sup>3</sup>      |                |
| Programme reinforcement stage 3                                                                                                             | Half-day dance workshops for two control schools                           | 9 hours                      | £27 per hour                | 243                   | <u>729</u>     |
|                                                                                                                                             | 6 hour performance events for parents of girls at 3 intervention schools   | 18 hours                     | £27 per hour                | 486                   |                |
|                                                                                                                                             |                                                                            |                              |                             | Total                 | <u>£11,649</u> |
| BGDP Stages 0-3 costs £s                                                                                                                    |                                                                            | £11,649 2010-11 prices       |                             |                       |                |
| BGDP Stages 1-3 costs £s                                                                                                                    |                                                                            | £6,923 2010-11 prices        |                             |                       |                |
| BGDP Stages 1-3 minus control costs £s                                                                                                      |                                                                            | £3,988 2010-11 prices        |                             |                       |                |
| BGDP cost per school £s                                                                                                                     |                                                                            | £1,329 2010-11 prices        |                             |                       |                |
| BGDP cost per pupil £s                                                                                                                      |                                                                            | £44.31 2010-11 prices        |                             |                       |                |
| *Research team administration, travel and other costs are not included. Control costs in this research are included for information         |                                                                            |                              |                             |                       |                |
| Sources: 1. research team 2. project budget - all prices are actual rates paid. 3. Project budget - all costs are actual expenses incurred. |                                                                            |                              |                             |                       |                |

**Resources, estimated total costs and average cost per participant 2010-11 prices**

| <b>Stage of BGDG</b>                                    | <b>Description of resources used</b>                                                                                                                                                                                                     | <b>Total cost \$ (£, €)<br/>2010-11 prices</b> |
|---------------------------------------------------------|------------------------------------------------------------------------------------------------------------------------------------------------------------------------------------------------------------------------------------------|------------------------------------------------|
| <b>Stage-0</b><br>Pre-Programme<br>planning-development | Nine hours to adapt training programme for hip-hop genre,<br>two 3-hour sessions to prepare dance teachers for 9-week<br>intervention-delivery by lead-dance teacher, 20 hours<br>preparation by 3 dance teachers, disclosures-CRB forms | <b>\$8,525</b><br>£5,326<br>€6,238             |
| <b>Stage-1</b><br>Programme<br>preparation              | Space-hire for two 3-hour dance-taster sessions, dance<br>teacher's delivery of two 3-hour taster sessions, 2 control<br>recruitment presentations (90 minutes), postage costs                                                           | <b>\$936</b><br>£585<br>€685                   |
| <b>Stage-2</b><br>Programme delivery                    | Delivery of 18 dance classes at 90 minutes per class over 9<br>weeks in three schools, incentives for intervention schools,<br>incentives for control schools data collection, refreshments                                              | <b>\$9,575</b><br>£5,982<br>€7,007             |
| <b>Stage-3</b><br>Programme<br>reinforcement            | Three dance workshops for two control schools at 90<br>minutes per workshop, three 6-hour end-of-intervention<br>performance events for parents                                                                                          | <b>\$1,153</b><br>£720<br>€843                 |
| BGDG Stages 0-3                                         | <b>Total cost</b>                                                                                                                                                                                                                        | <b>\$20,189</b><br>£12,613<br>€14,773          |
| BGDG Stages 1-3                                         | <b>Total cost</b>                                                                                                                                                                                                                        | <b>\$11,664</b><br>£7,287<br>€8,535            |
| BGDG Stages 1-3                                         | <b>Total cost minus research costs</b>                                                                                                                                                                                                   | <b>\$7,666</b><br>£4,789<br>€5,609             |
|                                                         | <b>BGDG Cost per participant (N = 90)</b>                                                                                                                                                                                                | <b>\$85.17</b><br>£53.21<br>€62.32             |

Table IV. Preference rankings of first choice leisure activities at each time point N (%)

| After-school leisure activity                                                                                         | Time 2  |         | Time 1  |         | Baseline Time 0 |         |
|-----------------------------------------------------------------------------------------------------------------------|---------|---------|---------|---------|-----------------|---------|
|                                                                                                                       | Ranking | N (%)   | Ranking | N (%)   | Ranking         | N (%)   |
| Go around with friends to shopping centres, streets, parks just for fun                                               | 1       | 46 (26) | 1       | 33 (25) | 2               | 12 (18) |
| Use the internet for fun: chats, YouTube, Facebook, Bebo, Myspace, looking for music (do not include school homework) | 2       | 31 (17) | 3       | 20 (15) | 3               | 8 (12)  |
| Take part in sports, athletics or physical activity                                                                   | 2       | 31 (17) | 2       | 22 (17) | 1               | 13 (20) |
| Play with or see friends at your home or their homes                                                                  | 3       | 21 (12) | 4       | 11 (9)  | 5               | 5 (7)   |
| Read books for enjoyment (do not include school books)                                                                | 4       | 13 (7)  | 5       | 10 (8)  | 4               | 6 (9)   |
| Go to discos or dance classes                                                                                         | 5       | 11 (6)  | 8       | 5 (4)   | 5               | 5 (7)   |
| Play a musical instrument, sing, draw, paint or write                                                                 | 6       | 9 (5)   | 4       | 11 (9)  | 3               | 8 (12)  |
| Send text messages or use Twitter on your mobile phone                                                                | 7       | 8 (5)   | 7       | 6 (5)   | 5               | 5 (7)   |
| Play computer games                                                                                                   | 8       | 4 (2)   | 6       | 8 (6)   | 6               | 4 (6)   |
| Watch TV DVDs or playbacks of programmes                                                                              | 8       | 4 (2)   | 9       | 4 (3)   | 7               | 2 (3)   |
| <b>Total of valid* responses/total responses</b>                                                                      |         | 178/210 |         | 130/210 |                 | 68/210  |

\*A valid response = each after-school leisure activity is ranked by a separate number between 1 and 10 by each individual participant using a PDA

Table V. ~~Order of preferences and preference proportions of levels~~ Regression coefficients -indicating the value of dance classes at t0 (week 0) and t1 (week 9) by group allocation

|                                                                          | Control time 0<br>(n=104/120*) |      |         | Control time 1<br>(n=104/120*) |      |         | Intervention time 0<br>(n=80/90*) |      |         | Intervention time 1<br>(n=80/90*) |      |         |
|--------------------------------------------------------------------------|--------------------------------|------|---------|--------------------------------|------|---------|-----------------------------------|------|---------|-----------------------------------|------|---------|
|                                                                          | Coeff                          | SE   | P value | Coeff                          | SE   | P value | Coeff                             | SE   | P value | Coeff                             | SE   | P value |
| <b>Frequency of dance class:</b>                                         |                                |      | <0.01   |                                |      | <0.01   |                                   |      | <0.01   |                                   |      | 0.04    |
| Twice a week                                                             | <b>0.18</b>                    | 0.07 |         | <b>0.30</b>                    | 0.07 |         | <b>0.25</b>                       | 0.58 |         | <b>0.13</b>                       | 0.06 |         |
| Three times a week                                                       | -0.18                          | 0.07 |         | -0.30                          | 0.07 |         | -0.25                             | 0.58 |         | -0.13                             | 0.06 |         |
| <b>Cost:</b>                                                             |                                |      | <0.01   |                                |      | <0.01   |                                   |      | <0.01   |                                   |      | <0.01   |
| £1                                                                       | <b>0.22</b>                    | 0.05 |         | -0.17                          | 0.04 |         | <b>0.46</b>                       | 0.07 |         | <b>0.26</b>                       | 0.06 |         |
| £2                                                                       | -0.22                          | 0.05 |         | <b>0.17</b>                    | 0.04 |         | -0.46                             | 0.07 |         | -0.26                             | 0.06 |         |
| <b>Other hours available for leisure activities on dance class days:</b> |                                |      | <0.01   |                                |      | <0.01   |                                   |      | <0.01   |                                   |      | <0.01   |
| 2 hours                                                                  | <b>0.35</b>                    | 0.06 |         | -0.31                          | 0.65 |         | <b>0.76</b>                       | 0.11 |         | <b>0.37</b>                       | 0.08 |         |
| 3 hours                                                                  | -0.35                          | 0.06 |         | <b>0.31</b>                    | 0.65 |         | -0.76                             | 0.11 |         | -0.37                             | 0.08 |         |

Preferred level of attribute in bold, attribute most concerned with shaded dark grey, attribute least concerned with shaded light grey \*Number of valid responses from total possible responses

|                                                                                         | <b>Level preferences</b><br><i>Preference proportions<sup>‡</sup></i>                         |                                                                                               |                                                                                               |                                                                                               |
|-----------------------------------------------------------------------------------------|-----------------------------------------------------------------------------------------------|-----------------------------------------------------------------------------------------------|-----------------------------------------------------------------------------------------------|-----------------------------------------------------------------------------------------------|
| <b>Ranking of Attributes</b>                                                            | <b>Control time 0</b><br><i>(n=104/120*)</i>                                                  | <b>Control time 1</b><br><i>(n=104/120*)</i>                                                  | <b>Intervention time 0</b><br><i>(n=80/90*)</i>                                               | <b>Intervention time 1</b><br><i>(n=80/90*)</i>                                               |
| <b>1. Time for other activities on dance class days</b><br><i>2 hrs/day v 3hrs /day</i> | Having 2 hours remaining for other leisure activities on dance class days<br><i>67% v 33%</i> | Having 3 hours remaining for other leisure activities on dance class days<br><i>35% v 65%</i> | Having 2 hours remaining for other leisure activities on dance class days<br><i>82% v 18%</i> | Having 2 hours remaining for other leisure activities on dance class days<br><i>68% v 32%</i> |
| <b>2. Cost</b><br><i>50p v £1</i>                                                       | £1 cost<br><i>39% v 61%</i>                                                                   | 50p cost<br><i>58% v 42%</i>                                                                  | £1 cost<br><i>28% v 72%</i>                                                                   | £1 cost<br><i>37% v 63%</i>                                                                   |
| <b>3. Frequency of dance classes per week</b><br><i>1 p/wk v 2 p/wk</i>                 | 2 classes per week<br><i>41% v 59%</i>                                                        | 2 classes per week<br><i>36% v 64%</i>                                                        | 2 classes per week<br><i>38% v 62%</i>                                                        | 2 classes per week<br><i>44% v 56%</i>                                                        |

<sup>‡</sup> Preference proportions holding all else equal, the proportion of the sample that would choose particular level over the other within that attribute  
<sup>\*</sup> Number of valid responses from total possible responses
